1           **Contrasting functions of *Arabidopsis* SUMO1/2 isoforms with SUMO3**  
2           **intersect to modulate innate immunity and global SUMOylation responses**

3

4   Kishor Dnyaneshwar Ingole<sup>1,2</sup>, Mritunjay Kasera<sup>1</sup>, Harrold A. van den Burg<sup>3</sup>, and Saikat  
5   Bhattacharjee<sup>1\*</sup>

6

7   <sup>1</sup>Laboratory of Signal Transduction and Plant Resistance, UNESCO-Regional Centre for  
8   Biotechnology (RCB), NCR Biotech Science Cluster, 3<sup>rd</sup> Milestone, Faridabad-Gurgaon  
9   Expressway, Faridabad- 121 001, Haryana, India.

10

11   <sup>2</sup>Kalinga Institute of Industrial Technology (KIIT) University, Bhubaneswar- 751 024, Odisha,  
12   India.

13

14   <sup>3</sup>Molecular Plant Pathology, Swammerdam Institute for Life Sciences, Faculty of Science,  
15   University of Amsterdam, Science Park 904, 1098 XH, Amsterdam, Netherlands.

16

17   \* Corresponding author:

18   Saikat Bhattacharjee

19   E-mail: [saikat@rcb.res.in](mailto:saikat@rcb.res.in)

20

21   Short Title: Intersecting functions of *Arabidopsis* SUMO isoforms

22

23

24

25

## 26 **Abstract**

27 Reversible covalent attachment of SMALL UBIQUITIN-LIKE MODIFIERS (SUMOs) on  
28 target proteins regulate diverse cellular process across all eukaryotes. In *Arabidopsis thaliana*,  
29 most mutants with perturbed global SUMOylome display severe impairments in growth and  
30 adaptations to physiological stresses. Since SUMOs self-regulate activities of SUMOylation-  
31 associated proteins, existence of multiple isoforms introduces possibilities of their functional  
32 intersections which remain unexplored especially in plant systems. Using well-established  
33 defense responses elicited against virulent and avirulent *Pseudomonas syringae* pv. *tomato*  
34 strains, we investigated crosstalks in individual and combinatorial *Arabidopsis sum* mutants.  
35 Here we report that while *SUM1* and *SUM2* additively, but not equivalently suppress basal and  
36 TNL-specific immunity via down-regulation of salicylic acid (SA)-dependent responses, *SUM3*  
37 promotes these defenses genetically downstream of SA. Remarkably, the expression of *SUM3*  
38 is transcriptionally suppressed by SUMO1 or SUMO2. The loss of *SUM3* not only lowers basal  
39 or post-bacterial challenge responsive enhancements of SUMO1/2-conjugates but also reduces  
40 upregulation dynamics of defensive proteins and SUMOylation-associated transcripts.  
41 Combining a *sum3* mutation partially attenuates heightened immunity of *sum1* or *sum2* mutants  
42 suggesting intricate functional impingements among these isoforms in optimizing immune  
43 amplitudes. Similar *SUM1-SUM3* intersections also affect global SUMOylome responses to  
44 heat-shock affecting most notably the induction of selective heat-shock transcription factors.  
45 Overall, our investigations reveal novel insights into auto-regulatory mechanisms among  
46 SUMO isoforms in host SUMOylome maintenance and adjustments to environmental  
47 challenges.

48

49

50

## 51 **Author Summary**

52 In plants, similar to animals, protein functions are regulated at multiple levels. One prevalent  
53 mode is to allow covalent linkage of small proteins to specific amino acids on targets thereby  
54 affecting its fate and function. One such kind of modification named as SUMOylation involves  
55 attachment of SUMO proteins. A plant maintains strict control over its pool of SUMOylated  
56 proteins (termed SUMOylome) which upon biotic or abiotic stresses are altered to facilitate  
57 appropriate responses, returning back to steady-state when the threat subsides. In mutants of  
58 the model plant *Arabidopsis thaliana* having disturbed steady-state SUMOylome, growth and  
59 developmental defects ensue. These mutants are auto-immune showing more resistance to  
60 infection by the bacterial pathogen *Pseudomonas syringae*. However, Arabidopsis SUMO-  
61 family are comprised of multiple members raising the question about their specificity or  
62 functional crosstalks. We discovered that two SUMO members function in coordination to  
63 suppress immunity including the repression of a third member which supports defenses. The  
64 expression of this third member during pathogen attack or heat-shock influences the responsive  
65 changes in the host SUMOylome likely suggesting SUMOs themselves play vital role in these  
66 adaptations. Overall, our work highlights novel intersections of SUMO members in mounting  
67 stress-specific responses.

68

## 69 **Introduction**

70 Post-translational modifications (PTMs) dynamically and reversibly modulate target proteins  
71 properties either by affecting their fate, location, or function and facilitate transitory adaptations  
72 often necessary for developmental passages and responding to biotic/abiotic cues. Of special  
73 importance in this category is the reversible attachment of the SMALL UBIQUITIN-LIKE  
74 MODIFIER (SUMO) through a process known as SUMOylation. This highly conserved mode of  
75 covalently modifying proteins is utilized primarily to regulate nuclear functions such as DNA

76 replication, chromatin remodeling, transcription, and post-transcriptional processes in eukaryotes  
77 [1–3]. In plants, temperature perturbations, salinity changes and application of defensive hormones  
78 such as salicylic acid (SA) cause massive changes on global SUMOylome [4–6]. Interestingly, a  
79 vast majority of differentially SUMOylated proteins are nuclear, perhaps indicative of a rapid  
80 mechanism to modulate transcriptome in response to stimulus. Computational studies identify  
81 SUMOylation-annotated proteins as central relay players of protein-protein interaction webs,  
82 especially for transcriptional processes [7].  
83  
84 SUMOylation cascade recruits processed SUMOs with C-terminus di-glycine (GG) residues, a  
85 product of catalysis by specialized SUMO or Ubiquitin-like proteases (ULPs), to covalently attach  
86 via an isopeptide bond to  $\epsilon$ -amino group of lysine residues on target proteins. The modified lysine  
87 often is a part of a partially conserved motif,  $\psi$ -K-X-D/E ( $\psi$  = hydrophobic amino acid, X= any  
88 amino acid, D/E= aspartate/glutamate). A conjugatable SUMO, subsequently forms a thiol-ester  
89 bond with the SUMO E1 ACTIVATING ENZYME (SAE). A trans-esterification reaction further  
90 shuttles SUMO to the SUMO E2 CONJUGATING ENZYME 1 (SCE1) and then to target lysine  
91 on SUMOylation substrates. Enrichment of SUMOylated proteins upon heat shock reveal that  
92 SUMO1 can conjugate to itself and form poly-SUMO1 chains [5]. Although SCE1 is capable of  
93 catalyzing polySUMO-chain formation, members of SUMO E4 ligases the PROTEIN  
94 INHIBITOR OF ACTIVATED STAT LIKE protein (PIAL1/2 in Arabidopsis) enhance  
95 polySUMOylation [2,8,9]. Substrate specificities both for mono- or polySUMOylation are further  
96 regulated by SUMO E3 LIGASES such as HIGH PLOIDY2/METHYL METHANE  
97 SULFONATE21 (HPY2/MMS21) and SAP and MIZ1 (SIZ1) [10]. Fate of covalently-attached  
98 SUMOs may either include de-conjugation and recycling by SUMO proteases or targeted  
99 proteolysis of the substrate through ubiquitin-mediated pathway. Indeed, proteasome components  
100 are enriched in poly-SUMO1 pull-downs [5]. These interactions are non-covalent in nature

101 facilitated by hydrophobic amino acid-rich SUMO-interaction motifs (SIMs) present in the  
102 recipient. A group of moderately conserved SUMO-targeted ubiquitin ligases (STUbLs) bind poly-  
103 SUMO chains via internal SIMs to ubiquitinylate the substrate [11]. Interestingly, SIMs are also  
104 only enriched in the SUMOylation-associated proteins such as SIZ1, SCE1, SAE2, SUMO-  
105 protease EARLY IN SHORT DAYS 4 (ESD4), PIAL1/2, STUbLs implying strong auto-  
106 regulatory mechanisms [8,12]. Not the least, increasing evidences that reciprocal influences of  
107 phosphorylation, ubiquitination, and acetylation that often compete with or modulate the efficacy  
108 of SUMOylation highlights the complexity of crosstalks among PTMs [13–15].

109  
110 Unlike fruit fly, worm, or yeast, humans and plants express multiple SUMO isoforms [16]. In  
111 *Arabidopsis thaliana*, 4 SUMO isoforms are expressed namely SUMO1, SUMO2, SUMO3 and  
112 SUMO5 [4,17]. SUMO1 and SUMO2 share 89% sequence identity, whereas SUMO3 and SUMO5  
113 are considerably diverged from SUMO1 (48% and 35% identical, respectively). The homolog pair  
114 SUMO1/2 are a result of genomic duplication event of a SUMO clade that preceded the evolution  
115 of monocots and eudicots from common ancient angiosperms [18]. Tandem organization of *SUM2*  
116 and *SUM3* genes in *Arabidopsis* are a result of gene duplication subsequently followed by  
117 diversification of only *SUM3* sequences. At relative expression levels, *SUM1/2* are more abundant  
118 than *SUM3* or *SUM5* [19]. Partial overlaps in tissue-specific expression patterns and biochemical  
119 properties taken together with embryonic lethality of *sum1 sum2* double mutant indicate that plants  
120 require at least one functional copy of either of these redundant isoforms [20–22]. The *Arabidopsis*  
121 *sum3* mutant is viable with mild late-flowering phenotype [21]. Acutely different SUMO3  
122 however, unlike SUMO1/2, cannot form poly-SUMO chains *in vitro*, and shows little or no change  
123 to heat-shock treatment [4,17,19,21,23]. Not the least, SUMO1/2 but not SUMO3-modified  
124 targets, are efficiently deconjugated by SUMO proteases *in vitro* [17,24].

125

126 Host SUMOylome readjustments play a vital role in regulation of plant immunity and been  
127 comprehensively highlighted in several excellent reviews [25–27]. This was first evident in the  
128 Arabidopsis SUMO E3 ligase *SIZ1* mutant (*siz1-2*) and subsequently in SUMO protease mutants  
129 of *OVERLY TOLERANT TO SALT 1/2* (*OTS1/2*) and *ESD4* [6,20,28,29]. Increased accumulation  
130 of defensive hormone salicylic acid (SA) and constitutive expression of PATHOGENESIS-  
131 RELATED (PR) proteins in these mutants conferred enhanced resistance when challenged with  
132 the bacterial pathogen *Pseudomonas syringae* pv. *tomato* strain DC3000 (*PstDC3000*). In this  
133 context, it is therefore not surprising that pathogens attempt to manipulate host SUMOylome to  
134 increase their colonization efficiencies [30–32]. Several bacterial phytopathogenic effectors  
135 interfere with host SUMOylation as a mode to suppress immunity [33,34]. XopD, a secreted  
136 effector from *Xanthomonas campestris* pv. *vesicatoria* (*Xcv*) de-conjugates SUMO from unknown  
137 targets in plants [35]. Mutations that disrupt SUMO-protease functions not only render the cognate  
138 strain deficient in virulence but also lower host defense induction.

139  
140 Suggestively, both SUM1/2 jointly suppress SA-dependent defenses since plants null for *SUM1*  
141 and expressing microRNA-silenced *SUM2* (*sum1-1 amiR-SUM2*) have drastically reduced total  
142 SUMO1/2-conjugates compared to wild-type and display heightened anti-bacterial immunity [21].  
143 The SUMO E3 ligase mutant *siz1-2*, also with lower levels of SUMO1/2 conjugates are similarly  
144 enhanced resistant to *PstDC3000* [20,28]. On the contrary, *esd4-1* or *ots1ots2* plants with deficient  
145 SUMO protease *ESD4* or *OTS1/2* functions, respectively have increased SUMO1/2-conjugates  
146 yet display elevated SA-dependent defenses [1,6,29]. Constitutive activation of SA-dependent  
147 defenses also occur in *SUM1/2*-overexpressing transgenic plants regardless of whether the over-  
148 expressed SUMO isoforms are conjugation-proficient or deficient [21]. Thus, it is likely that  
149 perturbations rather than increase or decrease in SUMO1/2-conjugates *per se* regulate immune  
150 responses. Unlike *SUM1/2*, *SUM3* is SA-inducible, upregulated in *sum1-1 amiR-SUM2* plants, and

151 upon over-expression enhance the resistance to *PstDC3000* [21]. SUMO3-mediated SUMOylation  
152 of NPR1 (NONEXPRESSOR OF PATHOGENESIS-RELATED 1), a master transducer of SA-  
153 signaling is essential for defenses thus placing *SUM3* as a *bona fide* positive immune regulator  
154 [36]. Whether increased SUMO3 activities during defenses intersect to alter SUMOylome  
155 outcomes of a host remains unexplored. Role of *SUM3* in other stress responses similarly is also  
156 unknown. Evidently, perturbing host SUMOylome during biotic/abiotic stresses or through  
157 loss/gain of a specific isoform function initiates complex signaling more especially because the  
158 SUMOs themselves moderate SUMOylation proficiencies of targets. SAE2, SCE1, SIZ1, and  
159 EDS4 were identified as candidates whose SUMOylation footprints change upon stress exposure  
160 [5]. Animal studies also elegantly demonstrate ‘SUMO-preference/switching’ wherein the isoform  
161 choice for substrate conjugation is modulated not only by their relative levels but also by its  
162 influence on SUMOylation machinery [37–39]. Hence, it is beyond doubt that SUMO isoforms  
163 functionally intersect when the host SUMOylome-equilibrium is disturbed. However, such  
164 evidences from plant systems are completely lacking.

165  
166 In this study, we utilized defense responses to various strains of *PstDC3000* as a measure to test  
167 the contribution of individual and combinatorial *Arabidopsis* SUMO isoforms in immunity. Our  
168 data suggest that *SUM1/2* function additively, but not equally, as negative regulators of SA-driven  
169 basal and TNL (Toll-Interleukin-1 receptor-like domain)-type immunity. In contrast, *SUM3* has a  
170 more positive immune role potentiating auto-immunity that occur due to loss of *SUM1* or *SUM2*.  
171 We demonstrate that accumulation kinetics of not only defense-associated markers but also of  
172 SUMOylation-associated genes are regulated by SUMO1-SUMO3 crosstalks. We further report  
173 that global change in a host SUMOylome in response to immune activation or heat-stress is also  
174 influenced by intersections of SUMO isoform activities. Overall, our results open newer avenues  
175 to unravel role of SUMO isoforms functions in maintenance and alterations of a host SUMOylome.

176

## 177 **Results**

### 178 ***SUM1/2* genetically function as negative immune regulators whereas *SUM3* promotes** 179 **defense responses**

180 To study individual *Arabidopsis* SUMO isoform influences on defenses, we obtained  
181 previously characterized knockout mutant lines of *sum1-1*, *sum2-1* and *sum3-1* [20,21]. Wild-  
182 type (Col-0) and mutant plants were propagated either in short day (SD) or long day conditions  
183 (LD) as indicated for respective assays. Interestingly, in all propagation regimes and especially  
184 in SD conditions, we noticed clear growth defects in *sum1-1*, but not *sum2-1* or *sum3-1* plants.  
185 The *sum1-1* mutant was developmentally dwarf with elongated leaves, reduced fresh tissue  
186 mass and increased trichomes density although with normal architecture compared to Col-0,  
187 *sum2-1* or *sum3-1* plants (Figs 1A,B; S1 Fig). Although identical *sum1-1* mutant has been  
188 utilized previously the morphological defects we observed have not been reported earlier. The  
189 reason for this discrepancy is not clear and we speculate differences in soil compositions or  
190 growth variations as possible contributing factors. Nevertheless, the phenotypic attributes of  
191 *sum1-1* were novel and we present evidences in subsequent sections that genetically link these  
192 defects solely to loss of *SUM1*.

193

194 We then investigated defense responses in the *sum* mutants utilizing the standard bacterial  
195 growth assays with virulent and avirulent *PstDC3000* strains. In Col-0, *PstDC3000* is virulent  
196 and triggers basal or PAMP-triggered immunity (PTI). In contrast, *PstDC3000* harboring  
197 *avrRps4*, *avrRpm1*, or *hopA1* effector is avirulent, triggering effector-triggered immunity  
198 (ETI), mediated by the cognate resistance gene *RPS4*, *RPM1* or *RPS6*, respectively [40]. The  
199 virulent *PstDC3000* strain we used harbors the plasmid backbone into which the avirulent  
200 effectors were cloned and hence named as *PstDC3000* (empty vector; *EV*) in subsequent



201 sections. Fully expanded leaves of 3-4 weeks-old SD-grown plants were infiltrated with the  
202 indicated *PstDC3000* strains and the growth of the bacteria measured at 0- and 3-days post-  
203 infiltration (dpi). When compared to Col-0, total bacterial growth was reduced almost 10-fold  
204 in the *sum1-1* and ~8-fold in *sum2-1* plants whereas *sum3-1* allowed more bacterial colonization  
205 (~8-fold higher) (Fig 1C). These results implied that *SUM1/2* and *SUM3* function as negative  
206 and positive regulators of PTI, respectively. When challenged with avirulent *PstDC3000*  
207 expressing *avrRps4* or *hopA1*, two TNL-specific ETI-eliciting effectors, lower bacterial  
208 accumulation than Col-0 persisted in the *sum1-1* and *sum2-1* plants (Fig 1D; S2A Fig). The  
209 *sum3-1* plants were hyper-susceptible to these avirulent infections. Curiously, modest but  
210 consistent difference with less bacterial accumulation in *sum1-1* than *sum2-1* was observed to  
211 virulent or *PstDC3000(hopA1)* but not to *PstDC3000(avrRps4)* challenges. Further on,  
212 increased callose deposits, a well-established defensive phenomenon [41], were more  
213 pronounced in *sum1-1* (~3-fold) and *sum2* (~2-fold) than Col-0 in response to both virulent as  
214 well as avirulent (*avrRps4*) *PstDC3000* (Fig 1E; S3 Fig). Although previous studies suggest  
215 redundant roles of *SUM1/2* in defenses [21], as our results implicate that their degree of  
216 contribution however may slightly vary. Likely indicative of enhanced susceptibility to  
217 *PstDC3000*, lower levels of callose than Col-0 accumulated in *sum3-1*. Remarkably, ETI in all  
218 plants to avirulent *PstDC3000 (avrRpm1)* remained comparable suggesting that CNL-type  
219 responses are not affected by the loss of individual SUMO isoforms (S2B Fig). Indeed, as  
220 reported earlier *avrRpm1*-mediated HR is not affected in any *sum* mutants [21]. Overall, we  
221 identify a partial redundancy between *SUM1/2* with a concomitant antagonism to *SUM3*  
222 functions in immune responses to *PstDC3000* strains.

223

224 **Basal levels of SA and SA-responsive defense markers are upregulated in *sum1-1* and**  
225 ***sum2-1***

226 Significant increases in salicylic acid, both free (SA) and glucose-conjugated (SAG), mediate  
227 signal responses against *PstDC3000* [42]. A SUMOylation-deficient and enhanced resistant  
228 *siz1-2* plants have elevated SA/SAG due to upregulated expression of SA-biosynthesis gene  
229 *SID2/ICS1* (*SALICYLIC ACID INDUCTION DEFICIENT2/ ISOCHORISMATE SYNTHASE1*)  
230 [21,43]. To determine whether SA/SAG perturbations reflect the immune outcomes, we  
231 measured their relative levels in the different *sum* mutants. Remarkably, both *sum1-1* and *sum2-*  
232 *1* plants contained significantly elevated whereas the hyper-susceptible *sum3-1* had lower  
233 SA/SAG, respectively than Col-0 (Figs 2A,B). We noted that SA/SAG levels in *sum1-1* plants  
234 were slightly higher than *sum2-1*, perhaps indicative of its modestly higher degree of basal and  
235 TNL-type immunity. Transcripts of *SID2/ICS1*, defense-associated markers *PR1* and *PR2*, and  
236 *PR2* protein levels were upregulated in both *sum1-1* and *sum2-1* whereas in *sum3-1* plants these  
237 were significantly lower than Col-0 (Figs 2C,D). Likewise, increased expressions of PTI  
238 markers *FLG22-INDUCED RECEPTOR LIKE KINASE 1* (*FRK1*) and *WRKY*  
239 *TRANSCRIPTION FACTOR 29* (*WRKY29*) [44] than Col-0 were detected in both *sum1-1* and  
240 *sum2-1* plants (Fig 2E). Relative to Col-0, *FRK1* expression remained unaltered in *sum3-1*,  
241 whereas *WRKY29* was drastically reduced suggesting that *SUM3* promotes expression of only  
242 a subset of PTI-markers. Accumulation of a well-known SA-responsive TNL-type R protein  
243 *SUPPRESSOR OF npr1-1 CONSTITUTIVE 1* (*SNC1*) is enhanced in several auto-immune  
244 mutants [45,46]. Remarkably, both *sum1-1* and *sum2-1* displayed upregulated *SNC1*  
245 expressions whereas in *sum3-1* the transcript levels remained comparable to Col-0 (Fig 2E).  
246 Since *FRK1*, *WRKY29* and *SNC1* are SA-inducible, upregulated SA-signaling sectors likely  
247 contribute to the enhanced basal and TNL-type immunity in *sum1-1* and *sum2-1* while these  
248 defenses are deficient in *sum3-1*. Also taking into account that *SUM3* but not *SUM1* or *SUM2*,  
249 is SA-inducible [21], we reasoned that enhanced resistance in *sum1-1* or *sum2-1* may be due to  
250 elevated *SUM3* expression and its role as a positive immune regulator. Indeed, we detected ~3-

251 and 2-fold higher *SUM3* transcripts than Col-0 in *sum1-1* and *sum2-1*, respectively (Fig 2F).  
252 Relative transcript levels of *SUM1* in *sum2-1*, or *SUM2* in *sum1-1* however remain unaltered.  
253 Overall our results identify redundant but unequal roles of *SUM1* and *SUM2* in suppressing SA-  
254 dependent defenses that include expression of PTI markers, *SNCI* and *SUM3*.

255

256 **Expression of genomic copies of *SUM1* or *SUM3* complement immune response**  
257 **alterations in the respective *sum* mutants**

258 Phenotypic abnormalities of *sum1-1* plants necessitated us to genetically link the defects to loss  
259 of *SUM1*. Although our *sum1-1* mutant is identical to earlier reports [20,21], to validate our  
260 observations, we utilized the transgenic *His-H89R-SUM1* line that express a His<sub>6</sub>-tagged  
261 genomic *SUM1* variant (H89R) from its native promoter in a *sum1-1 sum2-1* background [5].  
262 These plants as reported earlier not only complement the lethality of double homozygous *sum1-1*  
263 *sum2-1* mutant but also functionally mirror wild-type SUMO1 SUMOylation changes upon  
264 heat stress. From the *His-H89R-SUM1* plants, the *sum2-1* mutation was segregated out by  
265 generating F2 populations upon crossing with *sum1-1*. Henceforth, we termed these plants as  
266 *sum1-1:His-H89R-SUM1*. We constantly observed that growth defects we noted earlier were  
267 always linked to homozygous *sum1-1* genotypes in absence of the *His-H89R-SUM1* transgene.  
268 Thus, a functional *SUM1* abolishes the growth defects apparent for *sum1-1* plants (S4 Fig). We  
269 noted that the *sum1-1:His-H89R-SUM1* plants had slightly elevated *SUM1* (but not *SUM2*)  
270 transcripts compared to Col-0 (Fig 3A). Implicatively, as reported earlier for *SUM1* over-  
271 expression [21], SA/SAG levels although considerably reduced in comparison to the *sum1-1*  
272 parent, were still maintained at slightly higher levels than Col-0 (Fig 3B). Increased SA/SAG  
273 levels in *sum1-1:His-H89R-SUM1* plants also resulted in upregulated *SUM3* transcripts and  
274 higher PR1 proteins in comparison to Col-0 (Figs 3A,C). In pathogen growth assays using the  
275 virulent *PstDC3000(EV)*, enhanced defenses noticeable for *sum1-1* was abrogated to Col-0

276 levels in the *sum1-1:His-H89R-SUM1* plants (Fig 3D). Interestingly, the avirulent  
277 *PstDC3000(hopA1)* challenge although diminished enhanced resistance relative to the *sum1-1*  
278 parent, nevertheless these plants displayed stronger defenses than Col-0 (Fig 3D). This likely  
279 is attributed to higher than Col-0 levels of SA-regulated defense networks. These results  
280 unambiguously support the loss of *SUM1* as the cause of enhanced resistance and phenotypic  
281 defects in *sum1-1*.

282

283 We also generated two independent complemented lines of *sum3-1* to validate immune  
284 deficiencies due to the loss of *SUM3*. These transgenic plants express native promoter-driven  
285 His<sub>6</sub>-StrepII-tagged genomic fragment of *SUM3* (*sum3-1:HS-SUM3*). Although owing to its  
286 low abundance [21] the expression of His<sub>6</sub>-StrepII-SUMO3 proteins remained undetectable in  
287 immunoblots, transcripts of *SUM3* drastically reduced in the *sum3-1*, were restored to  
288 equivalent or slightly lower (~0.5X) than Col-0 levels in Line #1 and Line #2, respectively (Fig  
289 3A). Relative abundance of *SUM1* or *SUM2* remained unaffected in both lines. For further  
290 assays, we therefore continued with *sum3-1:HS-SUM3#1*. We observed that deficiencies in  
291 SA/SAG or PR1 protein accumulations inherent to *sum3-1* were reinstated to Col-0 levels in  
292 the *sum3-1:HS-SUM3#1* plants suggesting functional complementation by the transgene (Figs  
293 3B,C). Pathogen growth assays with either virulent *PstDC3000(EV)* or avirulent  
294 *PstDC3000(hopA1)* strains regained Col-0 levels of resistance in *sum3-1:HS-SUM3#1* (Fig  
295 3D). These data lead us to conclude that defensive deficiencies in *sum3-1* is indeed due to loss  
296 of *SUM3*.

297

### 298 **Constitutively active defenses in *sum1-1* and *sum2-1* caused rapid induction of immunity**

299 To further establish that upregulated or dampened defense marker expressions in *sum1-1*, *sum2-*  
300 *1* or *sum3-1*, respectively contribute to corresponding immune outcomes we challenged these

301 plants with virulent *PstDC3000(EV)* or avirulent *PstDC3000(avrRps4)* strains. Leaf extracts  
302 harvested at 6-, 12-, and 24-hpi were used to compare accumulation kinetics of *PR1/PR2*  
303 transcripts and proteins (Fig4; S5 Fig). Basal level (0-hpi) of PR1 in Col-0, *sum2-1*, or *sum3-1*  
304 was below detection limit whereas in *sum1-1* some enhancements were noticeable (Fig 4A). At  
305 6- or 12-hpi although Col-0 or *sum3-1* barely accumulated sufficient PR1/PR2 in response to  
306 both pathogen challenges, both *sum1-1* and *sum1-2* had markedly elevated levels of these  
307 proteins (Figs 4B,C). A similar trend continued at 24-hpi wherein in Col-0, PR2 but not PR1  
308 proteins levels, almost matched *sum1-1* or *sum2-1*. Most significantly, even at the 24-hpi *sum3-*  
309 *1* plants were deficient in accumulating wild-type levels of PR1 or PR2. Real-time accumulation  
310 kinetics of *PR1/PR2* transcripts to both bacterial infiltrations in general mirrored the  
311 corresponding protein levels although in some instances a direct correlation was not apparent  
312 (S5 Fig). Although the reason for this discrepancy is not clear, suggested role of SUMOylation  
313 in selective translation and/or its crosstalk with other PTMs that modulate protein synthesis or  
314 stability may likely be the cause [47,48]. Nevertheless, these data provide strong molecular  
315 evidence of constitutive SA-regulated defenses in *sum1-1* and *sum2-1* conferring their enhanced  
316 resistance to *PstDC3000* strains. Contrastingly, delayed induction of defenses upon a pathogen  
317 challenge likely makes *sum3-1* hypersusceptible.

318

### 319 **Enhanced defenses in *sum1-1* is SA-dependent**

320 To genetically determine whether constitutive SA-signaling routes impart increased defenses  
321 to *sum1-1*, we generated *sum1-1sid2-1* and *sum1-1eds1-2* double mutants. A *sid2-1* plant  
322 harbors a null mutation in *SID2/ICS1* whereas an *eds1-2* expresses a non-functional EDS1  
323 (ENHANCED DISEASE SUSCEPTIBILITY1), a central player orchestrating SA-mediated  
324 defenses [43,49]. In segregating F2 populations, we noted that phenotypic defects always  
325 associated with homozygous *sum1-1* allele provided at least one functional copy of *EDS1* or

326 *SID2* were present (data not shown). Remarkably, the reduced leaf mass apparent in *sum1-1*  
327 was improved in *sum1-1eds1-2* and *sum1-1sid2-1* plants (Fig 5A; S1 Fig). While *sum1-1eds1-*  
328 *2* achieved wild-type mass, abolishing *SID2/ICS1* in *sum1-1* although ameliorated growth  
329 defects but these plants still retained *sid2-1*-characteristics including smaller and paler leaves  
330 than Col-0 (Fig 5A; S1 Fig). Interestingly, both *sum1-1sid2-1* or *sum1-1eds1-2* had wild-type  
331 trichome densities unlike the *sum1-1* parent thus associating these defects to perturbations in  
332 SA-regulated networks (S6A Fig).

333  
334 Loss of either *EDS1* or *SID2/ICS1* remarkably abolished accumulated PR2 proteins and  
335 upregulated *PRI*, *PR2*, *FRK1* and *WRKY29* transcripts in *sum1-1* (Figs 4A, 5B; S6B Fig).  
336 Further on, pathogen growth assays using virulent and avirulent *PstDC3000* strains  
337 demonstrated that *sid2-1* or *eds1-2* mutations were epistatic to *sum1-1* abolishing not only the  
338 increased defenses but also conferring hyper-susceptibility to the respective double mutants  
339 towards virulent *PstDC3000(EV)* or avirulent (*avrRps4-* or *hopA1*-expressing) strains (Figs  
340 5C,D; S6C Fig). Neither *eds1-2* nor *sid2-1* mutation affected resistance towards avirulent  
341 *PstDC3000 (avrRpm1)* which remained comparable to *sum1-1* or Col-0 (S6D Fig). As  
342 expected, loss of *EDS1* or *SID2/ICS1* prevented accumulation of PR1 or PR2 proteins during  
343 *PstDC3000* infections (Figs 4B,C). With these assays, we identify that enhanced resistance in  
344 *sum1-1* is undoubtedly due to constitutive SA-routed defense signaling. A *sum2-1eds1-2* double  
345 mutant, we also generated, mimicked *sum1-1eds1-2* hyper-susceptible outcomes in disease  
346 assays (S7 Fig). Overall, our results provide several parallel lines of evidences suggesting  
347 *SUM1/2* intersections on SA-mediated immune signaling.

348

349 ***sum3-1* alleviates enhanced defenses in *sum1/2* mutants**

350 Since our data suggested antagonistic involvement of *SUM1/2* and *SUM3* as negative or  
351 positive defense regulators, respectively we surmise a crosstalk between these isoforms. To  
352 investigate this, we generated *sum1-1sum3-1* double mutant by genetic crossing. Unlike *sum1-1*  
353 *leds1-2* or *sum1-1sid2-1*, only partial restoration of *sum1-1* growth defects was observed in  
354 *sum1-1sum3-1* plants (Fig 6A; S8A,B Figs). These observations hinted that *SUM3* is mildly  
355 responsible for *sum1-1* growth anomalies. Increased trichome densities noticed in *sum1-1*  
356 however remained unaffected by the loss of *SUM3* (S6A Fig). Because *SUM3* affects basal SA  
357 accumulation (Figs 2A,B), we tested defense outputs are altered in *sum1-1 sum3-1*. Elevated  
358 SA levels in *sum1-1* were marginally reduced in *sum1-1 sum3-1* plants. Indeed, the expression  
359 of *SID2/ICS1* remained comparable between *sum1-1* and *sum1-1 sum3-1* plants (Fig 2C).  
360 Additionally, *PR1* or *PR2* transcripts in *sum1-1 sum3-1*, were intermediate between *sum1-1* and  
361 Col-0. These data imply *SUM3* does not affect SA-biosynthesis but modulates positive  
362 feedback loop of SA-signaling wherein it intersects with *SUM1* role as a transcriptional  
363 repressor of *SID2/ICS1*, *PR1* or *PR2*. As is therefore expected, loss of *SUM3* reduced PR1 or  
364 PR2 levels in *sum1-1* (Fig 4A). Not the least, we also demonstrate that increased SNC1  
365 accumulation in *sum1-1* plants although reduced in *sum1-1 sum3-1*, are still maintained higher  
366 than Col-0 levels (Fig 6B).

367  
368 In pathogen growth assays, either virulent *PstDC3000(EV)* or avirulent *PstDC3000 (hopA1)*  
369 strains accumulated to intermediate levels in *sum1-1 sum3-1* leaves, particularly higher than  
370 *sum1-1*, but significantly lower than in Col-0 or *sum3-1* (Fig 6C; S8C Fig). Interestingly, wild-  
371 type level of resistance was observed in *sum1-1 sum3-1* to the avirulent effector *avrRps4* (Fig  
372 6D). Growth of avirulent *PstDC3000 (avrRpm1)* was not affected in *sum1-1sum3-1* and  
373 remained comparable in all plants (S8D Fig). As investigated earlier, in response to virulent  
374 and avirulent *PstDC3000(avrRps4)* infections and unlike *sum1-1*, *sum1-1 sum3-1* remained

375 deficient in induction of PR1 or PR2 at 6-hpi (Figs 4B,C; S9A,B Figs). However, we observed  
376 that at later time points (12- and 24-hpi) loss of *SUM3* did not affect the rapid induction of  
377 PR1/PR2 in *sum1-1*. This is a sharp contrast to *sum3-1* plants which even at 24-hpi accumulated  
378 very less PR1/PR2 proteins. Thus, although *SUM3* is deemed essential for upregulation of  
379 PR1/PR2 upon a pathogen attack, *sum1-1* plants eventually overcome this requirement. Taken  
380 together, we principally support that *SUM3* promotes *PR1/PR2* transcription downstream of SA  
381 as suggested earlier [21]. We provide further molecular evidence that *SUM1* suppression of  
382 defenses likely is upstream of SA and may involve transcriptional repression of *SID2/ICS1* and  
383 its subsequent consequences on SA-responsive markers such as *PR1*, *PR2*, *FRK1*, *WRKY29* and  
384 *SNCI* among others.

385  
386 Adjacent chromosomal arrangement of *SUM2* and *SUM3* in Col-0 genome suggest that they  
387 likely arose by a tandem duplication event [18]. Hence, unlike a *sum1-1 sum3-1* double mutant,  
388 a *sum2-1 sum3-1* is difficult to obtain by genetic crossing. To test whether *SUM3* also intersects  
389 on *SUM2* function as a negative immune regulator, we generated *amiR-SUM2 sum3-1* plants  
390 by crossing the two parental lines. The *amiR-SUM2* plants reported earlier contains specific  
391 knockdown of *SUM2* and mimics the null mutant *sum2-1* [21]. *SUM1* or *SUM3* transcripts  
392 remain unaffected in these lines. Plants homozygous for *sum3-1* and containing *amiR-SUM2*  
393 transgene have significantly downregulated *SID2/ICS1*, *PR1* and *PR2* levels in comparison to  
394 a *sum2* mutant (Fig 2C). These transcripts however are still elevated than Col-0 plants  
395 implicating that *SUM3* functions impinge partially on *SUM2* role as a transcriptional repressor.  
396 This was also supported in pathogen challenges wherein growth of both virulent and avirulent  
397 *PstDC3000* strains were intermediate between resistant Col-0 and hyper-resistant *sum2* mutant  
398 (S7B,C Figs). Taken together, whether the functional antagonism in immune regulatory roles  
399 of *SUM1/2* and *SUM3* affect immune outcomes in plants.



400

401 **SUMO3, but not SUMO1, can form non-covalent homo-dimers**

402 Conjugation proficiencies *in planta* of SUMO isoforms are clearly different. Upon SA  
403 application, drastic increase in SUMO1/2 conjugates are observed whereas target modifications  
404 by SUMO3 is barely detectable even though *SUM3* expression, unlike *SUM1/2* is SA-inducible  
405 [6,21]. A distinct difference in the protein sequence of these isoforms is the presence of a  
406 predicted SIM motif in SUMO3 but not SUMO1/2 (S10 Fig). We utilized Bi-molecular  
407 Fluorescence Complementation (BiFC) assays to test homo- and hetero- non-covalent  
408 associations between SUMO1 and SUMO3. The BiFC vectors introduced via *Agrobacterium*-  
409 mediated transient transformation of *N. benthamiana* leaves expressed split YFP fusions of  
410 either SUMOylation-proficient (GG) or -deficient (AA) SUMOs wherein the C-terminal di-  
411 glycine (GG) residues were kept intact or mutated to di-alanine (AA), respectively (Fig 7A).  
412 Co-expression of only SUMO1GG/SUMO1GG, but not SUMO1GG/SUMO1AA or  
413 SUMO1AA/SUMO1AA showed reconstitution of the split YFP protein. Although positive  
414 BiFC indicate non-covalent interactions among protein partners, the lack of fluorescence in  
415 SUMO1AA/SUMO1AA suggests that SUMO1GG/SUMO1GG combinations and not homo-  
416 oligomers and likely reflect covalent polySUMO1-conjugates wherein the split fluorescent  
417 fusion proteins are in allowed proximity for reconstitution. Remarkably, all BiFC combinations  
418 of SUMO3 with itself, regardless of GG- or AA-forms, showed YFP fluorescence. Since  
419 SUMO3 lacks poly-SUMOylation properties [22], we reason that the observed associations are  
420 non-covalent SUMO3 oligomers. To test whether SUMO3 binds SUMO1 non-covalently,  
421 combinations of SUMO1GG or AA were co-expressed with SUMO3GG or AA. While  
422 SUMO1GG showed clear fluorescence when expressed with either SUMO3GG or AA, similar  
423 combinations of SUMO1AA did not. These observations are suggestive that only a conjugable-  
424 SUMO1 likely present on a target may achieve permissible molecular proximity *in vivo* to a

425 SUMO3 that may be either bound to a SIM (as in SUMO1GG/SUMO3AA pair) or attached  
426 covalently to the same target at a separate SUMOylation motif (as in SUMO1GG/SUMO3GG  
427 pair). Evidences from human cell lines demonstrate that ortholog of *Arabidopsis* SUMO3,  
428 HsSUMO1 ‘cap’ poly-SUMO chains of the SUMO1 ortholog HsSUMO2 [50,51]. Whether  
429 *Arabidopsis* SUMO3 regulates poly-SUMO1/2 chain lengths remain a promising possibility to  
430 explore further. Since no interaction was detected with SUMO1AA/SUMO3AA, it is clear that  
431 SUMO3 and SUMO1 do not interact non-covalently. To validate further, we performed *in vitro*  
432 binding assays with tagged recombinant SUMO1AA/SUMO3AA proteins expressed in *E. coli*.  
433 Enrichment of His-SUMO1AA via Ni<sup>2+</sup> beads failed to co-elute either Strep-SUMO1AA or  
434 Strep-SUMO3AA suggesting that SUMO1-SUMO1 homo- and SUMO1-SUMO3 hetero-  
435 dimers cannot form *in vitro* (Fig 7B). Homodimers of SUMO3AA however were detected by  
436 the presence of Strep-SUMO3AA in His-SUMO3AA-enriched eluates. These results support  
437 our hypothesis that BiFC interactions observed for SUMO1GG with SUMO3GG/AA may  
438 likely suggest close proximity, but not direct binding, of SUMO1 and SUMO3 *in planta*.

439

#### 440 **SUMO3 regulates SUMO1/2 conjugation efficiencies upon various stress exposures**

441 With the above results, it is encouraging to speculate that SUMOylation efficiencies may be  
442 modulated by intersecting SUMO1-SUMO3 functions. Since *SUM3* partially modulates *sum1-*  
443 *1* defenses, we investigated dynamic changes in SUMO1/2-SUMOylome in Col-0, *sum1-1*,  
444 *sum3-1*, or *sum1-1 sum3-1* upon a pathogen challenge. Leaf tissues either mock-treated or  
445 infiltrated with *PstDC3000(EV)*, were collected at 24-hpi and processed for selective qPCRs or  
446 immunoblots for SUMO1/2-conjugates. The polyclonal anti-SUMO1 antibody we used cannot  
447 distinguish SUMO1/2 isoforms and the lack of anti-SUMO3 antibodies prevented us for  
448 analyzing SUMO3-conjugates. We observed that while a pathogen exposure caused remarkable  
449 increase in SUMO1/2-conjugates in Col-0, for *sum1-1* these was considerably lower (Fig 8A).

450 These results suggested that SUMO1- rather than SUMO2-conjugates are not only more  
451 prevalent but also undergo massive increment upon pathogen treatment. Surprisingly, the  
452 conjugates are also distinctly lower in uninfected *sum3-1* and are considerably less upregulated  
453 than Col-0 in response to the pathogen infection. As is expected, in *sum1-1 sum3-1* extracts  
454 barely any SUMO-conjugates are detectable pre- or post-infection. With these results, we  
455 identify clear intersection of SUMO3 functions on SUMO1/2-conjugation efficiencies and its  
456 perturbations during a pathogen attack. We also observed that both *sum1-1:His-H89R-SUM1*  
457 and *sum3-1:HS-SUM3* plants achieved Col-0 levels of SUMO1/2-cojugates upon  
458 *PstDC3000(EV)* infection thus further validating the complete functional complementation of  
459 *sum1-1* or *sum3-1*, respectively (S11 Fig).

460

461 To determine whether changes in conjugation efficiencies are due to differential expression of  
462 SUMO isoforms and/or SUMOylation-associated genes, we investigated their relative  
463 expressions in Col-0 and the *sum* mutants (Figs 8B,C; S11B Fig). We observed that *SUM3*, but  
464 not *SUM1/2*, was upregulated upon a *PstDC3000(EV)* challenge. This is in accordance with  
465 *SUM3* being SA-inducible [21]. Additionally, we noticed that the enhanced *SUM3* expression  
466 in *sum1-1* was further boosted in pathogen-exposed samples. Curiously, for the investigated  
467 SUMOylation-associated genes although *sum1-1* mutation did not significantly alter their basal  
468 expression levels, several of these (*SAE2*, *SIZ1*, *HYP2*, *ESD4*, *ELSI*, and *OTS1*) were down-  
469 regulated in *sum3-1* plants. Thus, the modest reduction in global SUMOylome in *sum3-1* we  
470 observe may be attributed to *SUM3*-dependent modulation of expression of these genes.  
471 Interestingly, *sum1-1 sum3-1* plants showed slight upregulation of *SAE2*, *SCE1*, *SIZ1*, *HPY2*,  
472 *ELSI* and *OTS2* in mock-treatment supporting our earlier claim that *sum1-1* plants with  
473 constitutively active defenses and elevated SA levels, overcome the requirement of *SUM3* for  
474 the expression of these genes. We also noted that upregulation of *SAE2*, *SIZ1*, *ELSI* or *OTS1*

475 that occurred only modestly in Col-0 upon *PstDC3000(EV)* infection were further aggravated  
476 in *sum1-1*, but intermediate in *sum3-1* (Figs 8B,C). These enhancements are maintained in  
477 *sum1-1 sum3-1* plants and are likely *SUM3*-independent. Remarkably, *sum3-1* plants down-  
478 regulated the expression of *SUM1* and *SUM2* only upon pathogen-treatment highlighting that  
479 the positive immune function of *SUM3* may involve transcriptional repression of negative  
480 defense regulators such as *SUM1/2*. Overall, our data lead us to speculate that immune  
481 responses recruit *SUM1-SUM3* crosstalks to modulate the expression of these genes at a  
482 transcriptional level thereby influencing host SUMOylome changes.

483  
484 SAE2, SCE1, SIZ1 or EDS4 are direct SUMO1 targets and both SUMO1/3 interact *in planta*  
485 with SCE1 and SIZ1 [5,52]. These led us to test whether SUMO1-SUMO3 intersections directly  
486 influence the efficiency of SUMO1/2-conjugate formation through modulation of  
487 SUMOylation-associated protein functions. We utilized the *E. coli* SIZ1-independent  
488 *Arabidopsis* SUMOylation reconstitution system [53]. Co-expression of His-SUMO1, and  
489 Strep-SUMO3 (GG or AA) along with SCE1, and SAE1/2 showed modest but clear increase in  
490 SUMO1-conjugates in comparison to extracts that lacked Strep-SUMO3 (S12 Fig).  
491 Remarkably, a more dramatic increase in SUMO3-conjugates when co-expressed with either  
492 Strep-SUMO1 GG or AA was also noted. From these results, it is undeniably clear that SUMO1  
493 and SUMO3 have a mutually beneficial role in reciprocal SUMOylation process likely through  
494 modulation of SCE1 or SAE1/2 functions. The significant decrease in SUMO1/2 conjugates in  
495 absence of *SUM3* (Fig 8A) provides reasonable endorsement to our hypothesis.

496  
497 SUMO1/2-conjugates are enhanced in response to heat shock [20,21]. To test whether *SUM3*  
498 role intersect on these responses, we subjected Col-0, *sum1-1*, *sum3-1*, or *sum1-1 sum3-1* plants  
499 to heat shock and analyzed SUMO1/2-conjugates as well as relative expression levels of

500 *SUM1/2/3* and several previously characterized heat stress-responsive genes [54] (S13 Fig). In  
501 accordance with [20], we observe strong induction of SUMO1/2-conjugates in heat-treated Col-  
502 0 extracts (S13A Fig). These conjugates were low in heat-stressed *sum1-1* plants reinstating  
503 that SUMO1-mediated SUMOylation is most predominant during heat stress. Surprisingly, in  
504 *sum3-1* considerably reduced conjugates than Col-0 accumulated upon heat shock. We  
505 especially noted that unlike *PstDC3000* challenges, *SUM1/2* transcripts were significantly  
506 upregulated by heat-exposure, while *SUM3* induction was almost negligible (S13B Fig).  
507 Further on, transcriptional upregulation of *SUM1/2* was *SUM3*-independent. Therefore,  
508 reduced accumulation of SUMO1/2-conjugates in heat-treated *sum3-1* suggests that *SUM3*  
509 affects SUMO1-SUMOylation efficiencies at a post-transcriptional level. With these results,  
510 we infer that although different physiological stresses may cause apparently similar effects on  
511 global SUMO1/2-conjugates, the responsive routes to condition these are not only distinct but  
512 also stress-specific. Interestingly, increased expression of several heat stress-responsive  
513 markers such as *HsfA2*, *HSP22.0-ER* that are upregulated in Col-0 upon heat-treatment, were  
514 hyper-elevated in *sum1-1* suggesting *SUM1* suppresses their expression (S13C Fig). In *sum3-1*  
515 plants, their fold-induction upon heat stress was relatively lower than Col-0 implying that *SUM3*  
516 is partially responsible for their upregulation. Induction of other tested markers such as  
517 *HSP18.2* or *HSP23.5-P* were unaffected in *sum1-1* or *sum3-1* plants (S13D Fig). Taken  
518 together, our results clearly identify *SUM1-SUM3* crosstalks in responses to multiple stresses.

519

## 520 **Discussion**

521 Functional overlaps between *Arabidopsis* SUMO1 and SUMO2 isoforms, likely prevent  
522 noticeable phenotypic defects in the individual mutants under non-stressed conditions  
523 [17,20,21,23]. Interestingly, reduction in SUMO-conjugates both basally as well as upon heat-  
524 stress is more prominent in *sum1-1* than *sum2-1* suggesting a *SUM1* predominance in these

525 responses [20]. Our observations therefore of phenotypic defects in *sum1-1* but not *sum2-1*  
526 plants may reflect a similar developmental process preferentially regulated by *SUM1*. We  
527 convincingly establish that constitutive upregulation of SA-regulated networks is the primary  
528 cause of these defects in *sum1-1* (S6A Fig). This is unlike *siz1-2* where the associated growth  
529 abnormalities are EDS1- or SID2/ICS1-independent [55]. We deduce that reduction in global  
530 SUMO1/2- conjugates apparently similar between *siz1-2* and *sum1-1* affect downstream  
531 responses differently. At one instance, loss of *SIZ1* may affect SUMO-conjugation for all  
532 isoforms, whereas the *sum1-1* clearly restricts only SUMO1 functions. Previous studies propose  
533 SA antagonism or jasmonic acid (JA) promotion in increased trichome formation [56]. We  
534 reason that while direct application of SA or JA may affect trichome production as reported,  
535 the loss of *SUM1* whose substrates include both JA and SA signaling regulators such as *SIZ1*,  
536 *TPL*, or *JAZs* among others may impact trichome density through a more complex SA-JA  
537 crosstalk [5,57]. Further investigations into relative SA-JA signaling routes perturbed in *sum1-*  
538 *1* may unravel this mystery.

539  
540 In context of defense responses, our data provide substantial molecular support not only to  
541 individual *SUM1/2* or *SUM3* but also to their intersecting contributions as negative or positive  
542 regulators, respectively of anti-bacterial basal and TNL-specific immunity. Firstly, bacterial  
543 accumulations are strongly reduced in both *sum1-1* and *sum2-1*, with *sum1-1* displaying  
544 stronger immunity than *sum2-1*, for both virulent as well as avirulent *PstDC3000(hopA1)*  
545 infections. Although comparable immunity between *sum1-1* and *sum2-1* is observed for  
546 avirulent *PstDC3000(avrRps4)* challenges, this likely is due to relatively weaker ETI responses  
547 elicited by *AvrRps4* in comparison to *HopA1*-expressing *PstDC3000* (compare Fig 1D and  
548 S2A Fig). In contrast to *sum1/2* mutants, immunity in *sum3-1* is compromised implicating  
549 *SUM3* is essential for these defenses. Secondly, we demonstrate that impairment of SA-

550 signaling routes due to loss of *EDS1* (*eds1-2*) or *SID2/ICS1* (*sid2-1*) abolish enhanced resistance  
551 in *sum1-1* and *sum2-1* plants providing support to genetic placement of *SUM1/2* as suppressors  
552 of these defenses [21] (Fig 8D). In this pathway, *SUM3* partially delegates SA-defenses likely  
553 through positive feedback mechanisms. Indeed, both *sum1-1* and *sum2-1* plants accumulate  
554 increased SA than Col-0, while in *sum3-1*, these are relatively lower. Correspondingly,  
555 transcripts of SA-biosynthesis *SID2/ICS1* and responsive markers such as *FRK1*, *PR1*,  
556 *WRKY29*, and *SNC1* are upregulated in *sum1-1* or *sum2-1*, and lower in *sum3-1*. Accumulation  
557 kinetics of PR1/PR2 proteins or transcripts (Fig 4; S5 Fig) further validate primed or deficient  
558 SA-mediated defenses in *sum1-1* or *sum2-1* and *sum3-1*, respectively. The modest difference  
559 we note between *sum1-1* and *sum2-1*, in the upregulation of some of these SA-inducible  
560 markers, is suggestive of additive but unequal roles of *SUM1* and *SUM2* as negative immune  
561 regulators. Only ~17% common targets were identified between human SUMO1 and SUMO2  
562 isoforms suggesting that they are partially redundant at best [58]. Whether SUMOylation-  
563 targets distinct between *Arabidopsis* SUMO1 and SUMO2 isoforms affect immune amplitudes  
564 differentially awaits further studies.

565  
566 We provide the first *in planta* evidence of partial SUMO3 moderation on SUMO1/2 functions  
567 in biotic, abiotic and developmental responses. Introducing *sum3-1* mutation not only attenuates  
568 reduced tissue mass but also subdues enhanced resistance of *sum1-1* supporting *SUM3* role in  
569 promoting defenses downstream of SA. Thus, elevated SA and *PR1*, *PR2*, or *SNC1* expressions  
570 are partially dampened in either *sum1-1* or in *amiR-SUM2* plants when *SUM3* is mutated (Fig  
571 2). Intersections of *SUM3* functions on SUMOylation-proficiencies, are also best noted on  
572 SUMO1/2-conjugate intensities in response to different stresses. Although, enhancement upon  
573 heat shock or SA-treatments have been previously reported [5,6], we first report their  
574 upregulation in *PstDC3000* exposures. Induction of several SUMOylation-associated genes

575 such as *SAE2*, *SIZ1*, *ELSI*, or *OTS1* during *PstDC3000* challenges are influenced by *SUM1*-  
576 *SUM3* intersections and contribute to the corresponding defense outcomes (Fig 8). Recently,  
577 the activity of TPR1, a transcriptional co-repressor involved in suppression of negative defense  
578 regulators *DND1/2* was reported to be regulated in a partial SA-dependent manner via  
579 SUMOylation by *SIZ1* [59]. SUMOylation-deficient TPR1 not only is more enhanced in  
580 repressing *DND1/2* expressions, but also its over-expression cause enhanced resistance than the  
581 SUMOylation-proficient TPR1. Overall, our results raised the possibility that increased  
582 SUMO1/2 conjugates may reflect negative feedback mechanisms to maintain immune  
583 responses as transitory thus regulating *SUM3* functions in promoting defenses.

584

585 Functional intersections among SUMO isoforms are anticipated at multiple post-transcriptional  
586 events. Amino acid distinctions at key conserved positions among the SUMO isoforms  
587 influence their *in vivo* conjugation proficiencies [60] (Schematically summarized in S10 Fig).  
588 Aspartate63 (D<sup>63</sup>) in *Arabidopsis* SUMO1 (D<sup>75</sup> in SUMO2) is replaced by Asparagine63 (N<sup>63</sup>)  
589 in SUMO3, reducing its relative interaction strength than SUMO1 with SCE1, thus lowering  
590 its poly-SUMO formation efficiencies. Other residues also diverged in SUMO3 weaken  
591 thioester-bond formation and interaction with SAE1. Whether *SUM3* upregulation during  
592 defences improve these propensities and hence alters host SUMOylome outcomes although  
593 remains unknown, evidential support is obtained from several studies. Mutants with decreased  
594 SUMOylation including *siz1-2* have increased SCE1 protein abundance [15,20,61]. And *siz1-2*  
595 impairment in accumulating SUMO-conjugates during heat stress, is completely recovered in  
596 *pial1 pial2 siz1-2* plants [8]. Considering PIAL1/2 improves SCE1 ability to form otherwise  
597 less efficient polySUMO3 chains, defense responses with upregulated *SUM3* likely introduces  
598 competition between SUMO1 and SUMO3 for substrate polySUMOylation thereby altering  
599 their fates via respective isoform-specific SUMO-targeted E3 Ubiquitin ligases (STubLs) [8].



600 Indeed, *pial1/2* double mutants although less stress-tolerant, have upregulated levels of proteins  
601 related to biotic stress [8,15]. In *sum1-1*, the reduced global SUMO1/2-conjugates upon  
602 pathogen or heat-shock challenges taken together with elevated *SUM3* transcripts is suggestive  
603 of this occurrence and need to be explored further.

604

605 As substrates of Arabidopsis SCE1 and ESD4, candidates predominantly involved in RNA-  
606 related processes such as nucleocytoplasmic transport, splicing, or turnover and chromatin-  
607 modification including transcriptional activation/repression-associated proteins were identified  
608 [62]. A majority of these candidates possessed predicted SUMOylation motifs and were  
609 covalently modified by both SUMO1 or SUMO3. In *Arabidopsis*, a SUMOylation-proficient  
610 SUMO1 is essential to covalently charge SCE1 at the catalytic site, promote its association with  
611 SIZ1, and form the ternary complex (SUMO-SCE1-SIZ1) [52]. Interestingly, the subcellular  
612 localization of this complex is determined by the specific SUMO isoform bound non-covalently  
613 at the SIM site distinct from the catalytic pocket of SCE1. Since SCE1 possess ability to  
614 distinguish substrates for SUMOylation [9], selection of substrates and formation of  
615 polySUMO chains therefore may be affected by fluctuations in relative SUMO1/3 levels, as  
616 has been previously suggested in animal studies [63,64]. Our data showing reciprocal  
617 improvements in SUMOylation efficiencies *in vitro* regardless of conjugation-proficiencies of  
618 the influencing SUMO isoform may suggest towards one such consequence of SUMO1-  
619 SUMO3 crosstalks (S12 Fig). Likewise, constitutive activation of defenses due to over-  
620 expression of either conjugation-proficient (GG) or -deficient ( $\Delta$ GG) SUMO isoforms may at  
621 least be partially attributed to this phenomenon [21].

622

623 SUMOylation machineries such as SAE2, SIZ1 and ESD4 also bind SUMOs non-covalently  
624 owing to their intrinsic SIMs [12,65]. It is postulated that spatio-temporal regulations of

625 SUMOylation/de-SUMOylation coordination primarily by SIZ1 and ESD4 regulate steady-  
626 state levels of host proteins conjugated to SUMOs which surprisingly are fewer in numbers [2].  
627 Dramatic changes in this minimal SUMOylome across various stress conditions reveal that  
628 instead of newer targets undergoing covalent modifications by SUMOs, SUMOylation levels  
629 on prior-SUMOylated proteins pools are more altered [66]. Likely, functional inactivation of  
630 SUMO proteases especially noted post-stress in mammalian systems [67–69] and enhanced  
631 pool of SUMOylated pool SIZ1 [66] coordinate to achieve this. Taking this into account, a host  
632 SUMOylome output is likely to be influenced by relative changes in SUMO isoforms. Indeed,  
633 we demonstrate that transcripts of *SIZ1*, *EDS4* or *SAE2* are up-regulated basally in *sum1-1*, and  
634 in both Col-0 or *sum1-1* upon pathogen challenge in a *SUM3*-dependent manner (Fig 8). Hence  
635 the requirement of *SUM3* to maintain and adjust optimal level of SUMO1/2 SUMOylome is  
636 clearly evident. Non-covalent associations with SUMOs also affect chromatin architecture via  
637 their interaction with DNA methyltransferases and demethylases [11]. Expression of  
638 FLOWERING LOCUS C (FLC), a central transcription factor of flowering is dynamically  
639 regulated by DNA methylation status while the protein function is modulated by HPY2, SIZ1  
640 and SUMO proteases [70,71]. FLC regulation presents a classical example of this versatility of  
641 SUMO-influences on a developmental process.

642  
643 Stimulus-driven SUMO isoform switches and subsequent fate of substrates have been widely  
644 documented in animal systems [37–39]. The mammalian GTPase activating protein RanGAP1  
645 although is equally modified by SUMO1/2/3 *in vitro*, conjugation *in vivo* to SUMO1, but not  
646 SUMO2, imparts more stability from isopeptidases thereby facilitating its association with  
647 Nup358 [39]. Similarly, HDAC1 is targeted for degradation upon SUMOylation by SUMO1,  
648 but not SUMO2, in cancerous cell lines thus potentiating invasive properties of the tumour [72].  
649 Specific SUMO-proteases also regulate stimulus-dependent SUMO isoform switching [73].

650 Upon arsenic exposure, SUMO2 at Lys<sup>65</sup> of PML (Promyelocytic leukemia protein) is replaced  
651 with SUMO1 to direct its ubiquitinylation. Clearly with the isoform selectivity regulated at  
652 multiple levels, a host SUMOylome undergoes dynamic changes in response to physiological  
653 perturbations. Evidences on SUMO isoform switches however are completely lacking from  
654 plant systems. Nonetheless several reports suggest the likelihood of this phenomenon. The  
655 effector XopD from *Xcv* is a SUMO3-specific isopeptidase [17]. The replication protein AL1  
656 from Tomato Golden Mosaic Virus (TGMV) and the RNA-dependent RNA polymerase N1b  
657 from Turnip mosaic virus (TuMV) interact with and require SCE1 for replication [74,75].

658  
659 While our results undoubtedly place SUMO3 as a strong contributor in regulating dynamics  
660 changes in a host SUMOylome, the loss of *SUM3* in many *Brassicaceae* and other higher  
661 eudicots still remain an enigma [18]. Whether functions of *SUM3* has been incorporated in  
662 *SUM1/2* roles in these plants remains to be explored further. We foresee the immediate need of  
663 a plant system that would facilitate enrichment via distinct affinity tags on individual SUMO  
664 isoforms in order to obtain evidences of SUMO preference, switches and intersections. To  
665 summarize, our data lay the foundation on functional impingements of *Arabidopsis* SUMO  
666 isoforms and their adjustments on global SUMOylome in response to physiological changes.

667

## 668 **Methods**

### 669 **Plant materials and growth conditions**

670 *Arabidopsis thaliana* mutant lines *sum1-1* (SAIL\_296\_C12), *sum2-1* (SALK\_029775C) and  
671 *sum3-1* (SM\_3\_2707/SM\_3\_21645) were obtained from Arabidopsis stock centre  
672 (<https://www.arabidopsis.org>). Seeds of *amiR-SUM2 sum3-1* were generated by Dr. Harrold  
673 van den Burg. All plants were grown at 22°C with 70% humidity under Long Days (LD; 16 h:

674 8 h, light: dark) or Short Days (SD; 8 h: 16 h, light : dark) having light intensity  $100 \mu\text{mol } \mu\text{m}^{-2}\text{s}^{-1}$   
675 light. Specific growth conditions are indicated in respective legends. To generate  
676 combinatorial mutants, *sum1-1* was genetically crossed with *eds1-2*, *sid2-1* or *sum3-1* mutant  
677 plants. The *sum2-1* mutant was similarly crossed with *eds1-2* to generate *sum2-1 eds1-2*.  
678 Double mutants (*sum1-1 eds1-2*, *sum1-1 sid2-1* and *sum1-1 sum3-1*) were identified in F2  
679 population by PCR based genotyping. To generate *sum1-1:His-H89R-SUM1*, *His-H89R-SUM1*  
680 [5] was crossed with *sum1-1*. Segregating F2 populations were PCR-based genotyped for the  
681 presence of homozygous *sum1-1*, wild-type *SUM2* and homozygous copies of *His-H89R-SUM1*  
682 transgene. All primers used are listed in S1 Table.

683

#### 684 **Trichome visualisation and quantification**

685 For trichome visualization, leaves from 4-weeks old SD-grown plants were harvested and  
686 washed in Acetic acid: Ethanol (1:3) solution for overnight to bleach all pigments then  
687 visualised under bright field in a fluorescence microscope. The images were captured as 4848  
688 X 3648 pixels from 4.1 mm<sup>2</sup> leaf area. The trichome numbers were counted in 10 randomly  
689 selected images. Experiment was repeated twice with similar observations.

690

#### 691 **Salicylic acid (SA) measurements**

692 Free salicylic acid (SA) and glucose-conjugated SA (SAG) measurements were done using the  
693 *Acinetobacter* sp. ADPWH\_ *lux* biosensor system [76]. In brief, 100 mg leaf tissues were  
694 collected and frozen in liquid nitrogen. The tissue was homogenized in 250 $\mu\text{l}$  of acetate buffer  
695 (0.1 M, pH 5.6). Samples were centrifuged at 12000 rpm for 15 minutes. One aliquot (100 $\mu\text{l}$ )  
696 of the supernatant was used for free SA measurements, and another was incubated with 6U of  
697  $\beta$ -glucosidase (Sigma-Aldrich) for 90 min at 37°C for total SA measurement. 20 $\mu\text{l}$  aliquot of

698 each plant extract were added to 50µl of secondary culture of *Acinetobacter* sp. ADPWH\_ *lux*  
699 (OD<sub>600</sub> of 0.4) with additional 60 µl of LB. Standard SA solutions (prepared in *sid2-1* extract)  
700 were also taken to generate standard curve to calculate the amount of SA present in samples.  
701 Plate was incubated at 37°C for 1 h, and luminescence detected using the POLARStar Omega  
702 Luminometer (BMG Labtech). Data shown is representative of three biological replicates with  
703 SD.

704

### 705 ***In planta* assays for bacterial growth and kinetics of defense-associated marker** 706 **expressions**

707 Bacterial growth assays were performed according to [46]. Briefly, *PstDC3000* strains were  
708 infiltrated with a needleless syringe at a density of 5 X 10<sup>4</sup> cfu ml<sup>-1</sup> into fully expanded rosette  
709 leaves of 3-4-weeks-old SD grown plants. Leaf discs harvested from infiltrated area were  
710 macerated in 10mM MgCl<sub>2</sub>, serially diluted and plated onto selective medium plates. Bacterial  
711 growth was determined at 0 and 3-days post-infiltration. Bacterial infiltrations for kinetics of  
712 defensive markers were carried as above except a 5 X 10<sup>6</sup> cfu ml<sup>-1</sup> bacterial inoculum was used.  
713 Infiltrated samples harvested at 6, 12 and 24 hpi were processed separately for total RNA  
714 extraction and qPCR analysis or for immunoblots with indicated antibodies.

715

### 716 **Callose deposition assay and image analysis**

717 The callose deposition assays were performed according to [77]. In brief, 4-week-old leaves of  
718 SD grown Col-0, *sum1-1*, *sum2-1* and *sum3-1* plants were infected with the indicated  
719 *PstDC3000* strains. At 24 hpi, 3-4 random infiltrated leaves were harvested and washed first in  
720 Acetic acid: Ethanol (1:3) solution for overnight to bleach all pigments and then washed for 30  
721 min in 150 mM K<sub>2</sub>HPO<sub>4</sub> solution. The leaves were then incubated in dark for 2 hours in 150  
722 mM K<sub>2</sub>HPO<sub>4</sub> containing 0.01% aniline blue in a 16-well tray. Samples were then embedded in

723 50% glycerol and observed under a Nikon fluorescence microscope with DAPI filter. Images  
724 were analysed using IMARIS 8.0 software for quantifying the number of callose deposits/ mm<sup>2</sup>  
725 leaf area.

726

## 727 **RNA extraction and gene expression analysis by qRT-PCR**

728 Total RNA extraction and cDNA synthesis was performed as described later. All qPCR primers  
729 used in this study are listed in S1 Table. qPCRs were performed in QuantStudio 6 Flex Real-  
730 Time PCR system (Applied Biosystems) with 5X HOT FIREPol<sup>®</sup> EvaGreen<sup>®</sup> qPCR Mix Plus  
731 (ROX) (Solis BioDyne) according to the manufacturer's instructions. All qPCR experiments  
732 were replicated thrice with three biological and technical replicates (n=3). *SAND* (At2g28390)  
733 expression was used as internal control [46]. Relative expression was calculated according to  
734 the PCR efficiency<sup>-ΔΔCt</sup> formula. Expression differences were normalised to Col-0 and plotted  
735 as fold change.

736

## 737 **Protein extraction and western blotting**

738 For immunoblotting, leaf tissues collected at indicated time points/treatments were  
739 homogenised in protein extraction buffer [50 mM Tris HCl (pH 8.0), 8M Urea, 50 mM NaCl,  
740 1% v/v NP-40, 0.5% Sodium deoxycholate, 0.1% SDS and 1 mM EDTA] containing 20 mM  
741 *N*-ethylmaleimide (NEM), 1X plant protease inhibitors cocktail (Sigma Aldrich) and 2% w/v  
742 Polyvinylpyrrolidone (PVPP). The homogenates were clarified by centrifugation, mixed with  
743 2X Laemmli buffer, proteins separated by SDS-PAGE and then transferred onto polyvinylidene  
744 fluoride (PVDF) membrane by wet transfer method. The membrane was blocked with 5% non-  
745 fat skim milk and western blots performed with indicated primary antibodies [anti-SNC1  
746 (Abiocode), anti-PR1 or anti-PR2 (Agrisera), or anti-SUMO1 (Abcam), or anti-Actin C3  
747 antibodies (Abiocode)] in 1X TBST at 4<sup>0</sup>C for overnight. Comparable protein loading was

748 determined by Ponceau S staining of Rubisco subunit. Blots were washed thrice with 1X TBST  
749 and then incubated at RT for one hour with appropriate horse-radish peroxidase (HRP)-  
750 conjugated secondary antibodies. The blots developed using ECL<sup>TM</sup> Prime western blotting  
751 system (GE Healthcare) and visualised in ImageQuant<sup>TM</sup> LAS 4000 biomolecular imager (GE  
752 Healthcare).

753

#### 754 **SUMOylome changes in response to SA or heat shock treatments**

755 For salicylic acid (SA)-induced SUMOylation changes, extracts were obtained from 2-weeks  
756 old seedlings treated with 2 mM SA or buffer alone for 1 hour [6]. For heat shock treatments,  
757 2-weeks old seedlings were incubated at 37<sup>o</sup>C or at RT for 30 minutes. Total protein extracts  
758 were immunoblotted as described earlier.

759

#### 760 **Construction of Plasmid clones**

761 To generate cDNA clones of Arabidopsis *SUM1* and *SUM3* genes, total RNA isolated from  
762 Col-0 plants (RNAiso Plus; Takara) was reverse transcribed (iScript<sup>TM</sup> cDNA Synthesis Kit;  
763 Bio-Rad) according to manufacturer's instructions. Specific *SUM1* and *SUM3* (GG and AA  
764 forms) sequences were amplified (Phusion High-Fidelity DNA Polymerase; ThermoFisher)  
765 from the cDNA using the primers listed (S1 Table). PCR products were cloned into the Gateway  
766 entry vector *pDONR201* and subsequently into *pMDC-cCFP* and *pMDC-nVenus* (BiFC  
767 destination vectors; [40] using the Clonase<sup>TM</sup> Recombination system (ThermoFisher).  
768 Confirmed BiFC clones were then electroporated into *A. tumefaciens* GV3101 strain.

769 For dimerization studies, cDNAs of *SUM1AA* or *SUM3AA* were cloned as EcoRI-SalI fragment  
770 into *pASK-IBA16* vector (N-terminal Strep-tag II affinity tag; Neuromics). For *in vitro* isoform  
771 influence on SUMOylation assays *SUM1GG* or *SUM3GG* were cloned as EcoRI-SalI fragment  
772 into *pASK-IBA16* vector. These clones were named accordingly as Strep-SUMO1GG, Strep-

773 SUMO1AA, Strep-SUMO3GG, or Strep-SUMO3AA, respectively. For His-tagged versions,  
774 *pCDFDuet* vector harbouring *SUM1GG* (*pKT-973*), *SUM1AA* (*pKT-1017*), *SUM3GG* (*pKT-*  
775 *975*), or *SUM3AA* (*pKT-1788*) were used [53]. These plasmids were a kind gift from Prof.  
776 Katsunori Tanaka, Kwansei Gakuin University, Japan).

777

### 778 **Cloning and generation of *SUM3p-His-StrepII-SUM3g* transgenic plants**

779 Genomic DNA extracted from Col-0 plants were used for PCR of a ~1.3kbp genomic fragment  
780 with KpnI-SUM3p For/XbaI-SUM3-UTR Rev primers. Using the amplicon as a template, two  
781 independent PCRs were performed by using KpnI-SUM3p For/His-StrepII Rev or His-StrepII  
782 For/ XbaI-SUM3-UTR Rev primers combinations respectively. Individual PCR amplifications  
783 were used for overlap PCR with KpnI-SUM3p For/XbaI-SUM3-UTR Rev primers. The product  
784 was cloned into XbaI-KpnI site of the binary vector *pBIB-Hyg* [78]. Generated clones were  
785 sequenced and confirmed. The binary vector was introduced in *Agrobacterium* strain GV3101  
786 via electroporation. Pool of *sum3-1* plants were transformed via floral-dip method [79].  
787 Transgenic *sum3-1:HS-SUM3* plants were selected on Hygromycin containing medium,  
788 propagated through T3 generations to identify lines containing single locus but homozygous  
789 *sum3-1:HS-SUM3* transgenes. Subsequently, the plants were used for assays as indicated.

790

### 791 **Bimolecular Fluorescence Complementation (BiFC) assays**

792 All BiFC assays were performed according to [40]. Briefly, *Agrobacterium* cells harbouring  
793 the indicated BiFC vectors were induced with 150  $\mu$ M Acetosyringone for 4 hours, equal  
794 bacterial density suspensions of desired cCFP and nVenus BiFC combinations made and then  
795 infiltrated in leaves of 4-weeks old *N. benthamiana* plants. At 48-hpi, a small section of  
796 infiltrated area was imaged under a SP8 Leica confocal microscopy system using FITC filter  
797 (488-nm Argon Laser).



798

### 799 ***In vitro* SUMO binding assays**

800 SUMO-binding assays were performed with recombinant protein expressed in *E. coli*.  
801 Expression was induced with 200 µg/L Anhydrotetracycline (for *pASK-IBA16* clones) or with  
802 0.5 mM IPTG (for *pCDFDuet* clones) in BL21 (DE3) for overnight at 25°C. Cell pellet was  
803 resuspended in lysis buffer (50 mM NaH<sub>2</sub>PO<sub>4</sub>, 300 mM NaCl, 10 mM Imidazole; pH 8.0) and  
804 sonicated. Equal volumes of His- and Strep-II tagged-SUMO combination supernatants were  
805 mixed and incubated at 4°C with rotation for 2-3 hours to allow binding. Ni<sup>2+</sup>-NTA beads  
806 (Qiagen) were added to the mix and incubated further for 2 hrs. His-tagged protein pull down  
807 was performed under native conditions according to manufacturer's instructions. Immunoblots  
808 were performed with anti-His-HRP (Santa Cruz Biotech) or anti-StrepII-HRP (IBA  
809 Lifesciences) antibodies.

810

### 811 ***In vitro* SUMOylation reconstitution assays**

812 The His-tagged constructs used were according to [53]. Generation of Strep-tagged SUMO  
813 isoform clones have been described earlier. *E. coli* BL21 (DE3) cells containing both *pKT-973*  
814 (*SUMO1GG* + *SCE1*) and *pKT-978* (*SAE2* + *SAE1*) was transformed with either empty vector  
815 (*pASK-IBA16*), Strep-SUMO3GG, or Strep-SUMO3AA plasmids. Similarly, BL21 (DE3)  
816 cells containing *pKT-975* (*SUMO3GG* + *SCE1*) and *pKT-978* (*SAE2* + *SAE1*) was either  
817 transformed with either empty vector (*pASK-IBA16*), Strep-SUMO1GG, or Strep-SUMO1AA  
818 plasmids. As controls, conjugation-deficient SUMO1AA (*pKT-1017*) or SUMO3AA (*pKT-*  
819 *1788*) in combination with *pKT-978* was used. Transformed cells were induced with 200 µg/L  
820 Anhydrotetracycline and 0.5 mM IPTG for overnight at 25°C. After harvesting, cell pellets were  
821 lysed and immunoblotted with anti-His or anti-Strep antibodies.

822

## 823 **Statistical Analysis**

824 For all gene expression experiments, Student's t-test was performed to check significance and  
825 denoted by one, two and three asterisks (\*) indicating *p-value* <0.05, <0.01, and 0.001,  
826 respectively. For growth curve and other assays, ANOVA was performed to check statistical  
827 significance in growth of bacteria among different genotypes and indicated by alphabets e.g. a,  
828 b, c, d, e etc. which depict statistical difference from each other at *p-value* <0.001.

829

## 830 **Acknowledgements**

831 IKD, MK and SB deeply acknowledge DST-SERB (Grant No: EMR/2016/001899) and  
832 Regional Centre for Biotechnology (RCB), Faridabad for providing financial support and  
833 central instrumental facilities. We express our gratitude to Prof. Walter Gassmann, Missouri  
834 University, USA, and Prof. Ashis Kumar Nandi, Jawaharlal Nehru University (JNU), New  
835 Delhi, India for providing *PstDC3000* strains and *sid2-1* lines and SA measurements,  
836 respectively used in this study. We also thank Dr. Souvik Bhattacharjee (JNU) for providing  
837 *pASK-IBA16* plasmid and Prof. Katsunori Tanaka, (Kwansei Gakuin University, Japan) for  
838 providing *E. coli* SUMOylation reconstitution system constructs. IKD acknowledges  
839 Department of Biotechnology (DBT), Government of India for providing fellowships during  
840 his PhD tenure and KIIT University, Bhubaneswar, India for his PhD registration. MK thanks  
841 UGC for his PhD fellowship.

842

## 843 **Author Contributions**

844 SB conceived the research. IKD, MK and SB designed the research. IKD and MK performed  
845 all the experiments. HvdB generated *amiR-SUM2 sum3-1* line used in this study. SB helped in  
846 plasmid constructions and supervised the experiments. IKD, MK and SB analyzed the data and  
847 wrote the manuscript.

848

## 849 **References**

- 850 1. Morrell R, Sadanandom A. Dealing With Stress: A Review of Plant SUMO Proteases.  
851 Front Plant Sci. 2019;10: 1–19. doi:10.3389/fpls.2019.01122
- 852 2. Elrouby N. Extent and significance of non-covalent SUMO interactions in plant  
853 development. Plant Signal Behav. 2014;9: e27948. doi:10.4161/psb.27948
- 854 3. Zhao X. SUMO-Mediated Regulation of Nuclear Functions and Signaling Processes.  
855 Mol Cell. 2018;71: 409–418. doi:10.1016/j.molcel.2018.07.027
- 856 4. Kurepa J, Walker JM, Smalle J, Gosink MM, Davis SJ, Durham TL, et al. The small  
857 ubiquitin-like modifier (SUMO) protein modification system in Arabidopsis.  
858 Accumulation of sumo1 and -2 conjugates is increased by stress. J Biol Chem. 2003;278:  
859 6862–6872. doi:10.1074/jbc.M209694200
- 860 5. Miller MJ, Barrett-Wilt G a, Hua Z, Vierstra RD. Proteomic analyses identify a diverse  
861 array of nuclear processes affected by small ubiquitin-like modifier conjugation in  
862 Arabidopsis. Proc Natl Acad Sci U S A. 2010;107: 16512–16517.  
863 doi:10.1073/pnas.1004181107
- 864 6. Bailey M, Srivastava A, Conti L, Nelis S, Zhang C, Florance H, et al. Stability of small  
865 ubiquitin-like modifier (SUMO) proteases OVERLY TOLERANT to SALT1 and -2  
866 modulates salicylic acid signalling and SUMO1/2 conjugation in Arabidopsis thaliana.  
867 J Exp Bot. 2015;67: 353–363. doi:10.1093/jxb/erv468
- 868 7. Duan G, Walther D. The Roles of Post-translational Modifications in the Context of  
869 Protein Interaction Networks. PLoS Comput Biol. 2015;11: 1–23.  
870 doi:10.1371/journal.pcbi.1004049
- 871 8. Tomanov K, Zeschmann A, Hermkes R, Eifler K, Ziba I, Grieco M, et al. Arabidopsis  
872 PIAL1 and 2 promote SUMO chain formation as E4-type SUMO ligases and are

- 873 involved in stress responses and sulfur metabolism. *Plant Cell*. 2014;26: 4547–60.  
874 doi:10.1105/tpc.114.131300
- 875 9. Tomanov K, Nehlin L, Ziba I, Bachmair A. SUMO chain formation relies on the amino-  
876 terminal region of SUMO-conjugating enzyme and has dedicated substrates in plants.  
877 *Biochem J*. 2018;475: 61–74. doi:10.1042/BCJ20170472
- 878 10. Gareau JR, Lima CD. The SUMO pathway: Emerging mechanisms that shape  
879 specificity, conjugation and recognition. *Nat Rev Mol Cell Biol*. 2010;11: 861–871.  
880 doi:10.1038/nrm3011
- 881 11. Elrouby N, Bonequi MV, Porri A, Coupland G. Identification of Arabidopsis SUMO-  
882 interacting proteins that regulate chromatin activity and developmental transitions. *Proc*  
883 *Natl Acad Sci U S A*. 2013;110: 19956–61. doi:10.1073/pnas.1319985110
- 884 12. Wang J, Taherbhoy AM, Hunt HW, Seyedin SN, Miller DW, Miller DJ, et al. Crystal  
885 Structure of UBA2<sup>ufd</sup>-Ubc9: Insights into E1-E2 Interactions in Sumo Pathways. *PLoS*  
886 *One*. 2010;5. doi:10.1371/journal.pone.0015805
- 887 13. Park BS, Song JT, Seo HS. Arabidopsis nitrate reductase activity is stimulated by the  
888 E3 SUMO ligase AtSIZ1. *Nat Commun*. 2011;2: 400. doi:10.1038/ncomms1408
- 889 14. Hendriks IA, D’Souza RCJ, Yang B, Verlaan-de Vries M, Mann M, Vertegaal ACO.  
890 Uncovering global SUMOylation signaling networks in a site-specific manner. *Nat*  
891 *Struct Mol Biol*. 2014;21: 927–936. doi:10.1038/nsmb.2890
- 892 15. Nukarinen E, Tomanov K, Ziba I, Weckwerth W, Bachmair A. Protein sumoylation and  
893 phosphorylation intersect in Arabidopsis signaling. *Plant J*. 2017;91: 505–517.  
894 doi:10.1111/tpj.13575
- 895 16. Flotho A, Melchior F. Sumoylation: A Regulatory Protein Modification in Health and  
896 Disease. *Annu Rev Biochem*. 2013;82: 357–385. doi:10.1146/annurev-biochem-  
897 061909-093311

- 898 17. Colby T, Matthäi A, Boeckelmann A, Stuible HP. SUMO-conjugating and SUMO-  
899 deconjugating enzymes from Arabidopsis. *Plant Physiol.* 2006;142: 318–332.  
900 doi:10.1104/pp.106.085415
- 901 18. Hammoudi V, Vlachakis G, Schranz ME, van den Burg HA. Whole-genome  
902 duplications followed by tandem duplications drive diversification of the protein  
903 modifier SUMO in Angiosperms. *New Phytol.* 2016;1. doi:10.1111/nph.13911
- 904 19. Budhiraja R, Hermkes R, Müller S, Schmidt J, Colby T, Panigrahi K, et al. Substrates  
905 related to chromatin and to RNA-dependent processes are modified by Arabidopsis  
906 SUMO isoforms that differ in a conserved residue with influence on desumoylation.  
907 *Plant Physiol.* 2009;149: 1529–40. doi:10.1104/pp.108.135053
- 908 20. Saracco SA, Miller MJ, Kurepa J, Vierstra RD. Genetic analysis of SUMOylation in  
909 Arabidopsis: Conjugation of SUMO1 and SUMO2 to nuclear proteins is essential. *Plant*  
910 *Physiol.* 2007;145: 119–134. doi:10.1104/pp.107.102285
- 911 21. van den Burg HA, Kini RK, Schuurink RC, Takken FLW. Arabidopsis small ubiquitin-  
912 like modifier paralogs have distinct functions in development and defense. *Plant Cell.*  
913 2010;22: 1998–2016. doi:10.1105/tpc.109.070961
- 914 22. Castaño-Miquel L, Seguí J, Lois LM. Distinctive properties of Arabidopsis SUMO  
915 paralogues support the in vivo predominant role of AtSUMO1/2 isoforms. *Biochem J.*  
916 2011;436: 581–590. doi:10.1042/BJ20101446
- 917 23. Lois LM, Lima CD, Chua NH. Small ubiquitin-like modifier modulates abscisic acid  
918 signaling in Arabidopsis. *Plant Cell.* 2003;15: 1347–1359. doi:10.1105/tpc.009902
- 919 24. Chosed R, Tomchick DR, Brautigam CA, Mukherjee S, Negi VS, Machius M, et al.  
920 Structural analysis of Xanthomonas XopD provides insights into substrate specificity of  
921 ubiquitin-like protein proteases. *J Biol Chem.* 2007;282: 6773–6782.  
922 doi:10.1074/jbc.M608730200

- 923 25. Augustine RC, Vierstra RD. SUMOylation: re-wiring the plant nucleus during stress  
924 and development. *Curr Opin Plant Biol.* 2018;45: 143–154.  
925 doi:10.1016/j.pbi.2018.06.006
- 926 26. de Vega D, Newton AC, Sadanandom A. Post-translational modifications in priming the  
927 plant immune system: ripe for exploitation? *FEBS Lett.* 2018;592: 1929–1936.  
928 doi:10.1002/1873-3468.13076
- 929 27. van den Burg HA, Takken FLW. SUMO-, MAPK- and resistance protein-signaling  
930 converge at transcription complexes that regulate plant innate immunity. *Plant Signal*  
931 *Behav.* 2010;5: 1597–1601. doi:10.4161/psb.5.12.13913
- 932 28. Lee J, Nam J, Park HC, Na G, Miura K, Jin JB, et al. Salicylic acid-mediated innate  
933 immunity in Arabidopsis is regulated by SIZ1 SUMO E3 ligase. 2006; 79–90.  
934 doi:10.1111/j.1365-313X.2006.02947.x
- 935 29. Villajuana-Bonequi M, Elrouby N, Nordström K, Griebel T, Bachmair A, Coupland G.  
936 Elevated salicylic acid levels conferred by increased expression of ISOCHORISMATE  
937 SYNTHASE 1 contribute to hyperaccumulation of SUMO1 conjugates in the  
938 Arabidopsis mutant early in short days 4. *Plant J.* 2014;79: 206–219.  
939 doi:10.1111/tpj.12549
- 940 30. Wimmer P, Schreiner S. Viral mimicry to usurp ubiquitin and sumo host pathways.  
941 *Viruses.* 2015;7: 4854–4877. doi:10.3390/v7092849
- 942 31. Ribet D, Cossart P. Ubiquitin, SUMO, and NEDD8: Key Targets of Bacterial Pathogens.  
943 *Trends Cell Biol.* 2018;28: 926–940. doi:10.1016/j.tcb.2018.07.005
- 944 32. Verma V, Croley F, Sadanandom A. Fifty shades of SUMO: its role in immunity and at  
945 the fulcrum of the growth–defence balance. *Mol Plant Pathol.* 2018;19: 1537–1544.  
946 doi:10.1111/mpp.12625
- 947 33. Hotson A, Chosed R, Shu H, Orth K, Mudgett MB. Xanthomonas type III effector XopD

- 948 targets SUMO-conjugated proteins in planta. *Mol Microbiol.* 2003;50: 377–389.  
949 doi:10.1046/j.1365-2958.2003.03730.x
- 950 34. Roden J, Eardley L, Hotson A, Cao Y, Mudgett MB. Characterization of the  
951 *Xanthomonas AvrXv4* effector, a SUMO protease translocated into plant cells. *Mol*  
952 *Plant-Microbe Interact.* 2004;17: 633–643. doi:10.1094/MPMI.2004.17.6.633
- 953 35. Tan CM, Li MY, Yang PY, Chang SH, Ho YP, Lin H, et al. *Arabidopsis HFR1* is a  
954 potential nuclear substrate regulated by the *xanthomonas* type III effector  
955 *XopDXcc8004*. *PLoS One.* 2015;10: 1–18. doi:10.1371/journal.pone.0117067
- 956 36. Saleh A, Withers J, Mohan R, Marqués J, Gu Y, Yan S, et al. Posttranslational  
957 modifications of the master transcriptional regulator NPR1 enable dynamic but tight  
958 control of plant immune responses. *Cell Host Microbe.* 2015;18: 169–182.  
959 doi:10.1016/j.chom.2015.07.005
- 960 37. Meulmeester E, Kunze M, Hsiao HH, Urlaub H, Melchior F. Mechanism and  
961 Consequences for Paralog-Specific Sumoylation of Ubiquitin-Specific Protease 25. *Mol*  
962 *Cell.* 2008;30: 610–619. doi:10.1016/j.molcel.2008.03.021
- 963 38. Zhu J, Zhu S, Guzzo CM, Ellis NA, Ki SS, Cheol YC, et al. Small ubiquitin-related  
964 modifier (SUMO) binding determines substrate recognition and paralog-selective  
965 SUMO modification. *J Biol Chem.* 2008;283: 29405–29415.  
966 doi:10.1074/jbc.M803632200
- 967 39. Zhu S, Goeres J, Sixt KM, Békés M, Zhang XD, Salvesen GS, et al. Protection from  
968 Isopeptidase-Mediated Deconjugation Regulates Paralog-Selective Sumoylation of  
969 *RanGAP1*. *Mol Cell.* 2009;33: 570–580. doi:10.1016/j.molcel.2009.02.008
- 970 40. Bhattacharjee S, Halane MK, Kim SH, Gassmann W. Pathogen effectors target  
971 *Arabidopsis EDS1* and alter its interactions with immune regulators. *Science.* 2011;334:  
972 1405–1408. doi:10.1126/science.1211592

- 973 41. Voigt CA. Callose-mediated resistance to pathogenic intruders in plant defense-related  
974 papillae. *Front Plant Sci.* 2014;5: 1–6. doi:10.3389/fpls.2014.00168
- 975 42. Dempsey DA, Vlot AC, Wildermuth MC, Klessig DF. Salicylic Acid Biosynthesis and  
976 Metabolism. *Arab B.* 2011;9: e0156. doi:10.1199/tab.0156
- 977 43. Cui H, Gobbato E, Kracher B, Qiu J, Bautor J, Parker JE. A core function of EDS1 with  
978 PAD4 is to protect the salicylic acid defense sector in Arabidopsis immunity. *New*  
979 *Phytol.* 2017; 213(4):1802-1817. doi:10.1111/nph.14302
- 980 44. Sardar A, Nandi AK, Chattopadhyay D. CBL-interacting protein kinase 6 negatively  
981 regulates immune response to *Pseudomonas syringae* in Arabidopsis. *J Exp Bot.*  
982 2017;68: 3573–3584. doi:10.1093/jxb/erx170
- 983 45. Li Y, Li S, Bi D, Cheng YT, Li X, Zhang Y. SRFR1 negatively regulates plant NB-LRR  
984 resistance protein accumulation to prevent autoimmunity. *PLoS Pathog.* 2010;6: 1–11.  
985 doi:10.1371/journal.ppat.1001111
- 986 46. Kim SH, Gao F, Bhattacharjee S, Adiasor JA, Nam JC, Gassmann W. The arabidopsis  
987 resistance-like gene SNC1 is activated by mutations in SRFR1 and contributes to  
988 resistance to the bacterial effector AvrRps4. *PLoS Pathog.* 2010;6.  
989 doi:10.1371/journal.ppat.1001172
- 990 47. Chen LZ, Li XY, Huang H, Xing W, Guo W, He J, et al. SUMO-2 promotes mRNA  
991 translation by enhancing interaction between eIF4E and eIF4G. *PLoS One.* 2014;9.  
992 doi:10.1371/journal.pone.0100457
- 993 48. Watts FZ, Baldock R, Jongjitwimol J, Morley SJ. Weighing up the possibilities :  
994 Controlling translation by ubiquitylation and sumoylation. *Translation.* 2014; 30;2(2).  
995 doi: 10.4161/2169074X.2014.959366.
- 996 49. Wildermuth MC, Dewdney J, Wu G, Ausubel FM. Isochorismate synthase is required  
997 to synthesize salicylic acid for plant defence. *Nature.* 2001;414: 562–565.



- 998           doi:10.1038/417571a
- 999   50.   Matic I, Hagen M Van, Schimmel J, Macek B, Ogg SC. In Vivo Identification of Human  
1000       Small Ubiquitin-like Modifier Polymerization Sites by High Accuracy Mass  
1001       Spectrometry and an in Vitro to in Vivo Strategy. *Mol Cell Proteomics*. 2008;7(1):132-  
1002       44. doi: 10.1074/mcp.M700173-MCP200
- 1003   51.   Sharma P, Yamada S, Lualdi M, Dasso M, Kuehn MR. Senp1 Is Essential for  
1004       Desumoylating Sumo1-Modified Proteins but Dispensable for Sumo2 and Sumo3  
1005       Deconjugation in the Mouse Embryo. *Cell Rep*. 2013;3: 1640–1650.  
1006       doi:10.1016/j.celrep.2013.04.016
- 1007   52.   Mazur MJ, Kwaaitaal M, Mateos MA, Maio F, Kini RK, Prins M, et al. The SUMO  
1008       conjugation complex self-assembles into nuclear bodies independent of SIZ1 and COP1.  
1009       *Plant Physiol*. 2019;179: 168–183. doi:10.1104/pp.18.00910
- 1010   53.   Okada S, Nagabuchi M, Takamura Y, Nakagawa T, Shinmyozu K, Nakayama JI, et al.  
1011       Reconstitution of Arabidopsis thaliana SUMO pathways in E. coli: Functional  
1012       evaluation of SUMO machinery proteins and mapping of SUMOylation sites by mass  
1013       spectrometry. *Plant Cell Physiol*. 2009;50: 1049–1061. doi:10.1093/pcp/pcp056
- 1014   54.   Ohama N, Kusakabe K, Mizoi J, Zhao H, Kidokoro S, Koizumi S, et al. The  
1015       transcriptional cascade in the heat stress response of arabidopsis is strictly regulated at  
1016       the level of transcription factor expression. *Plant Cell*. 2016;28: 181–201.  
1017       doi:10.1105/tpc.15.00435
- 1018   55.   Hammoudi V, Fokkens L, Beerens B, Vlachakis G, Chatterjee S, Arroyo-Mateos M, et  
1019       al. The Arabidopsis SUMO E3 ligase SIZ1 mediates the temperature dependent trade-  
1020       off between plant immunity and growth. Quint M, editor. *PLOS Genet*. 2018;14:  
1021       e1007157. doi:10.1371/journal.pgen.1007157
- 1022   56.   An L, Zhou Z, Yan A, Gan Y. Progress on trichome development regulated by

- 1023 phytohormone signaling. *Plant Signal Behav.* 2011;6: 1959–1962.  
1024 doi:10.4161/psb.6.12.18120
- 1025 57. Srivastava AK, Orosa B, Singh P, Cummins I, Walsh C, Zhang C, et al. Sumo suppresses  
1026 the activity of the jasmonic acid receptor CORONATINE INSENSITIVE1. *Plant Cell.*  
1027 2018;30: 2099–2115. doi:10.1105/tpc.18.00036
- 1028 58. Vertegaal ACO, Andersen JS, Ogg SC, Hay RT, Mann M, Lamond AI. Distinct and  
1029 overlapping sets of SUMO-1 and SUMO-2 target proteins revealed by quantitative  
1030 proteomics. *Mol Cell Proteomics.* 2006;5: 2298–2310. doi:10.1074/mcp.M600212-  
1031 MCP200
- 1032 59. Niu D, Lin XL, Kong X, Qu GP, Cai B, Lee J, et al. SIZ1-Mediated SUMOylation of  
1033 TPR1 Suppresses Plant Immunity in Arabidopsis. *Mol Plant.* 2019;12: 215–228.  
1034 doi:10.1016/j.molp.2018.12.002
- 1035 60. Castaño-Miquel L, Seguí J, Lois LM. Distinctive properties of Arabidopsis SUMO  
1036 paralogues support the in vivo predominant role of AtSUMO1/2 isoforms. *Biochem J.*  
1037 2011;436: 581–90. doi:10.1042/BJ20101446
- 1038 61. Castaño-Miquel L, Mas A, Teixeira I, Seguí J, Perearnau A, Thampi BN, et al.  
1039 SUMOylation Inhibition Mediated by Disruption of SUMO E1-E2 Interactions Confers  
1040 Plant Susceptibility to Necrotrophic Fungal Pathogens. *Mol Plant.* 2017;10: 709–720.  
1041 doi:10.1016/j.molp.2017.01.007
- 1042 62. Elrouby N, Coupland G. Proteome-wide screens for small ubiquitin-like modifier  
1043 (SUMO) substrates identify Arabidopsis proteins implicated in diverse biological  
1044 processes. *Proc Natl Acad Sci U S A.* 2010;107: 17415–17420.  
1045 doi:10.1073/pnas.1005452107
- 1046 63. Capili AD, Lima CD. Structure and Analysis of a Complex between SUMO and Ubc9  
1047 Illustrates Features of a Conserved E2-Ubl Interaction. *J Mol Biol.* 2007;369: 608–618.

- 1048           doi:<https://doi.org/10.1016/j.jmb.2007.04.006>
- 1049   64.   Duda DM, van Waardenburg RCAM, Borg LA, McGarity S, Nourse A, Waddell MB,  
1050           et al. Structure of a SUMO-binding-motif Mimic Bound to Smt3p–Ubc9p: Conservation  
1051           of a Non-covalent Ubiquitin-like Protein–E2 Complex as a Platform for Selective  
1052           Interactions within a SUMO Pathway. *J Mol Biol.* 2007;369: 619–630.  
1053           doi:<https://doi.org/10.1016/j.jmb.2007.04.007>
- 1054   65.   Cheong MS, Park HC, Hong MJ, Lee J, Choi W, Jin JB, et al. Specific domain structures  
1055           control abscisic acid-, salicylic acid-, and stress-mediated SIZ1 phenotypes. *Plant*  
1056           *Physiol.* 2009;151: 1930–1942. doi:10.1104/pp.109.143719
- 1057   66.   Miller MJ, Scalf M, Rytz TC, Hubler SL, Smith LM, Vierstra RD. Quantitative  
1058           proteomics reveals factors regulating RNA biology as dynamic targets of stress-induced  
1059           SUMOylation in Arabidopsis. *Mol Cell Proteomics.* 2013;12: 449–63. Available:  
1060           <http://www.pubmedcentral.nih.gov/articlerender.fcgi?artid=3567865&tool=pmcentrez>  
1061           &rendertype=abstract%5Cn<http://www.ncbi.nlm.nih.gov/pubmed/23197790>
- 1062   67.   Bossis G, Melchior F. Regulation of SUMOylation by reversible oxidation of SUMO  
1063           conjugating enzymes. *Mol Cell.* 2006;21: 349–357. doi:10.1016/j.molcel.2005.12.019
- 1064   68.   Sydorskyy Y, Srikumar T, Jeram SM, Wheaton S, Vizeacoumar FJ, Makhnevych T, et  
1065           al. A Novel Mechanism for SUMO System Control: Regulated Ulp1 Nucleolar  
1066           Sequestration. *Mol Cell Biol.* 2010;30: 4452–4462. doi:10.1128/mcb.00335-10
- 1067   69.   Pinto MP, Carvalho AF, Grou CP, Rodríguez-Borges JE, Sá-Miranda C, Azevedo JE.  
1068           Heat shock induces a massive but differential inactivation of SUMO-specific proteases.  
1069           *Biochim Biophys Acta - Mol Cell Res.* 2012;1823: 1958–1966.  
1070           doi:10.1016/j.bbamcr.2012.07.010
- 1071   70.   Hepworth J, Dean C. Flowering locus C’s lessons: Conserved chromatin switches  
1072           underpinning developmental timing and adaptation. *Plant Physiol.* 2015;168: 1237–

- 1073 1245. doi:10.1104/pp.15.00496
- 1074 71. Kong X, Luo X, Qu GP, Liu P, Jin JB. Arabidopsis SUMO protease ASP1 positively  
1075 regulates flowering time partially through regulating FLC stability. *J Integr Plant Biol.*  
1076 2017;59: 15–29. doi:10.1111/jipb.12509
- 1077 72. Citro S, Jaffray E, Hay RT, Seiser C, Chiocca S. A role for paralog-specific sumoylation  
1078 in histone deacetylase 1 stability. *J Mol Cell Biol.* 2013;5: 416–427.  
1079 doi:10.1093/jmcb/mjt032
- 1080 73. Fasci D, Anania V, Lill J, Salvesen G. Response to comment on “sumo deconjugation  
1081 is required for arsenic-triggered ubiquitylation of PML.” *Sci Signal.* 2015;9: 1–12.  
1082 doi:10.1126/scisignal.aad9777
- 1083 74. Sanchez-Duran MA, Dallas MB, Ascencio-Ibanez JT, Reyes MI, Arroyo-Mateos M,  
1084 Ruiz-Albert J, et al. Interaction between Geminivirus Replication Protein and the  
1085 SUMO-Conjugating Enzyme Is Required for Viral Infection. *J Virol.* 2011;85: 9789–  
1086 9800. doi:10.1128/jvi.02566-10
- 1087 75. Xiong R, Wang A. SCE1, the SUMO-conjugating enzyme in plants that interacts with  
1088 NIB, the RNA-dependent RNA polymerase of Turnip mosaic virus, is required for viral  
1089 infection. *J Virol.* 2013;87: 4704–15. doi:10.1128/JVI.02828-12
- 1090 76. Defraia CT, Schmelz EA, Mou Z. A rapid biosensor-based method for quantification of  
1091 free and glucose-conjugated salicylic acid. *Plant Methods.* 2008;4: 1–11.  
1092 doi:10.1186/1746-4811-4-28
- 1093 77. Schenk ST, Hernández-Reyes C, Samans B, Stein E, Neumann C, Schikora M, et al. N-  
1094 acyl-homoserine lactone primes plants for cell wall reinforcement and induces resistance  
1095 to bacterial pathogens via the salicylic acid/oxylin pathway. *Plant Cell.* 2014;26:  
1096 2708–2723. doi:10.1105/tpc.114.126763
- 1097 78. Becker D. Binary vectors which allow the exchange of plant selectable markers and

1098 reporter genes. *Nucleic Acids Res.* 1990;18: 203. doi:10.1093/nar/18.1.203  
1099 79. Clough SJ, Bent AF. Floral dip: A simplified method for *Agrobacterium*-mediated  
1100 transformation of *Arabidopsis thaliana*. *Plant J.* 1998;16: 735–743. doi:10.1046/j.1365-  
1101 313X.1998.00343.x

1102

### 1103 **Supporting information**

1104 Additional supporting information may be found in the online version of this article.

1105 **S1 Fig: *sum3-1* partially alleviates, whereas *eds1-2* and *sid2-1* abolishes growth**  
1106 **deficiencies of *sum1-1*.**

1107

1108 **S2 Fig: *sum1-1* and *sum2-1* plants are enhanced resistant whereas *sum3-1* is**  
1109 **hypersusceptible to TNL-specific *PstDC3000(hopA1)* but not to CNL-specific**  
1110 ***PstDC3000(avrRpm1)* avirulent strains.**

1111

1112 **S3 Fig: *sum1-1* and *sum2-1* leaves display increased whereas *sum3-1* is deficient in callose**  
1113 **deposition in response to virulent *PstDC3000(EV)* or avirulent *PstDC3000(avrRps4)***  
1114 **infections.**

1115

1116 **S4 Fig: Developmental phenotype of 4-week-old SD grown plants of indicated genotypes.**

1117

1118 **S5 Fig: *sum1-1* and *sum2-1* display rapid whereas *sum3-1* is delayed than Col-0 in**  
1119 **induction of *PR1* and *PR2* transcripts in response to virulent *PstDC3000(EV)* or avirulent**  
1120 ***PstDC3000(avrRps4)* infections.**

1121

1122 **S6 Fig: Increased trichome density, elevated expression of PTI markers *FRK1* or**  
1123 ***WRKY29*, and enhanced resistance to avirulent *PstDC3000(hopA1)* in *sum1-1* is SA-**  
1124 **modulated.**

1125

1126 **S7 Fig: Enhanced basal immunity and ETI defences in *sum2-1* to TNL-specific *PstDC3000***  
1127 **strains is EDS1-dependent.**

1128

1129 **S8 Fig: Developmental defects and enhanced TNL-specific immunity in *sum1-1* is partially**  
1130 ***SUM3* regulated.**

1131

1132 **S9 Fig: *SUM3* buffers increased induction of *PR1* in *sum1-1* in response to *PstDC3000***  
1133 **challenges.**

1134

1135 **S10 Fig: Schematic representation of key amino acid conservation and divergences among**  
1136 **three *Arabidopsis* SUMO isoforms suggest their functional overlaps/distinctions.**

1137

1138 **S11 Fig: Complemented *sum1-1* or *sum3-1* lines have wild-type levels of SUMO1/2**  
1139 **conjugates upon *PstDC3000* (EV) infection.**

1140

1141 **S12 Fig: SUMO1 and SUMO3 cause reciprocal enhancements of SUMO-conjugates in *E.***  
1142 ***coli* SUMOylation-reconstitution system.**

1143

1144 **S13 Fig: *SUM3* mutation reduces SUMO1/2-conjugate enhancements during heat-shock.**

1145

1146 **S1 Table: List of primers used in this study.**

1147

## Figures

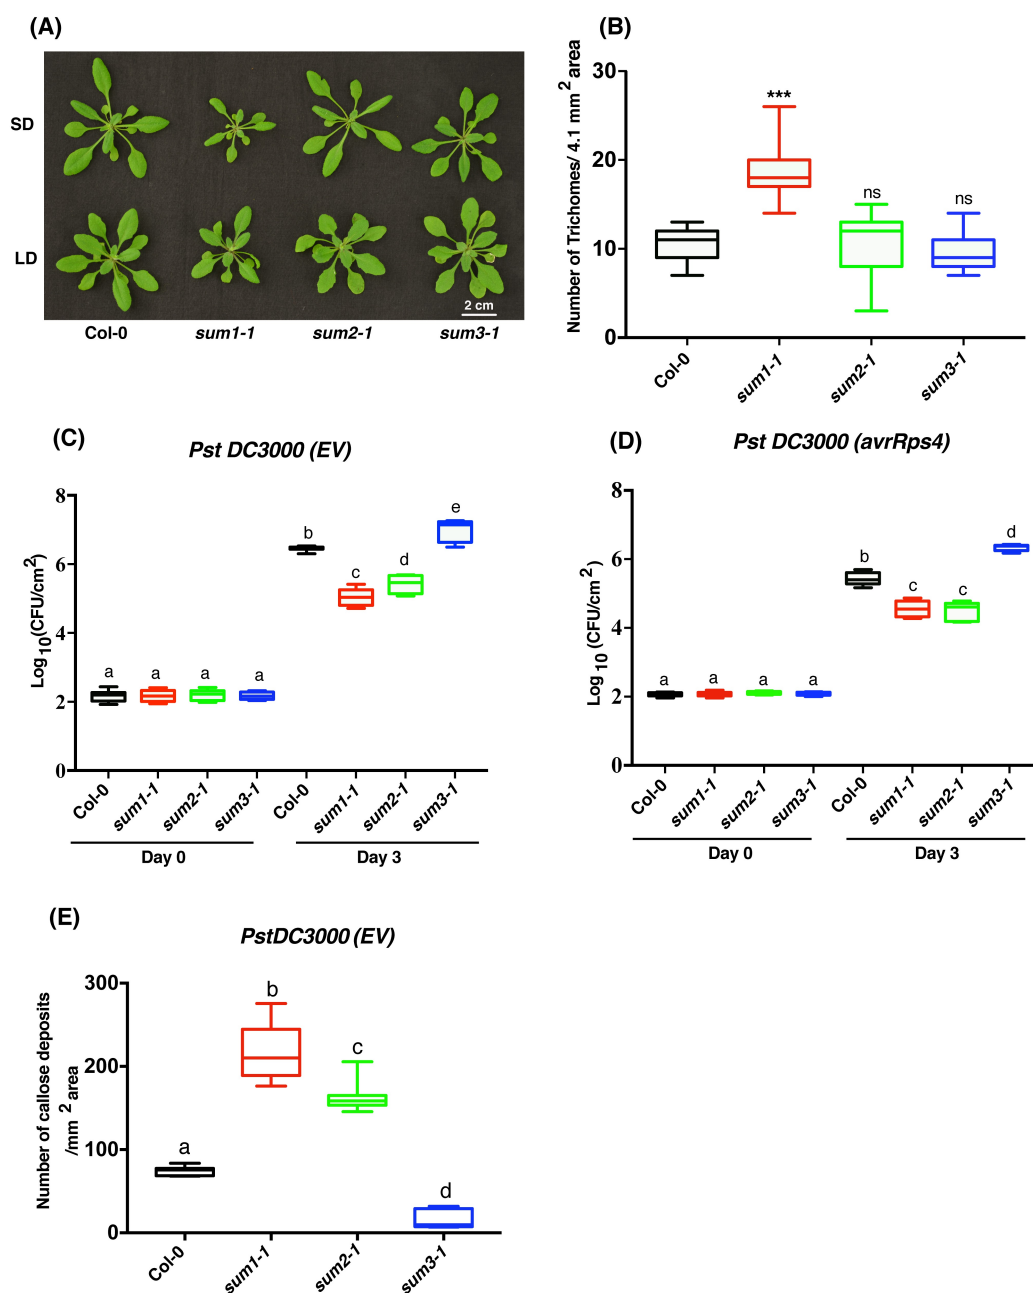

**Fig 1: *sum1* and *sum2* mutants display enhanced whereas *sum3* is deficient in defenses against *Pseudomonas syringae* pv. *tomato* (*PstDC3000*) strains.** (A) Developmental phenotypes of 4-week-old Col-0, *sum1-1*, *sum2-1*, and *sum3-1* mutants propagated under short day (SD) and long day (LD) growth conditions. (B) Whisker Box plot of trichome densities (#Trichomes/4.1 mm<sup>2</sup>) in Col-0 and *sum1-1*, *sum2-1*, and *sum3-1* mutants grown under SD conditions. Trichomes in 4-week-old plants were counted after imaging leaves under bright field in a fluorescence microscope. Error bars indicate standard deviation of trichome densities in 10 random images of

different leaf sections (n=10). \*\*\* indicates  $p < 0.001$ , ns= non-significant. (C-D) Growth of (C) virulent *PstDC3000(EV)* or (D) avirulent *PstDC3000(avrRps4)* strains, respectively in Col-0 and *sum1-1*, *sum2-1*, and *sum3-1* mutants. Three to four expanded leaves from 4-week-old plants of each genotype were infiltrated with the indicated bacterial suspension at a density of  $5 \times 10^4$  cfu ml<sup>-1</sup>. Leaf discs (of predefined diameter) were punched from the infiltrated area, macerated in 10mM MgCl<sub>2</sub>, serially diluted and plated on appropriate antibiotic plates. Bacterial titer was calculated at 0- and 3-dpi (days post-infiltration) for the indicated bacterial infection. Whisker Box plot with Tukey test; n= 12; ANOVA was performed to measure statistical significant differences (at  $p$ -value <0.001) in growth of bacteria in Log<sub>10</sub> scale. (E) Whisker Box plot of callose deposits/mm<sup>2</sup> area of infected leaves. Infiltrated leaves at 24-hpi (hours post-infiltration) were bleached in acetic acid: ethanol solution, stained with Aniline blue and were observed under DAPI filter in a fluorescence microscope. The images were analyzed in Imaris 8.0 software. The data is representative of callose deposits median from independent random sections area (n=10). Statistical significance was determined by Student's t-test (\*\*\*) indicates at  $p < 0.001$ .



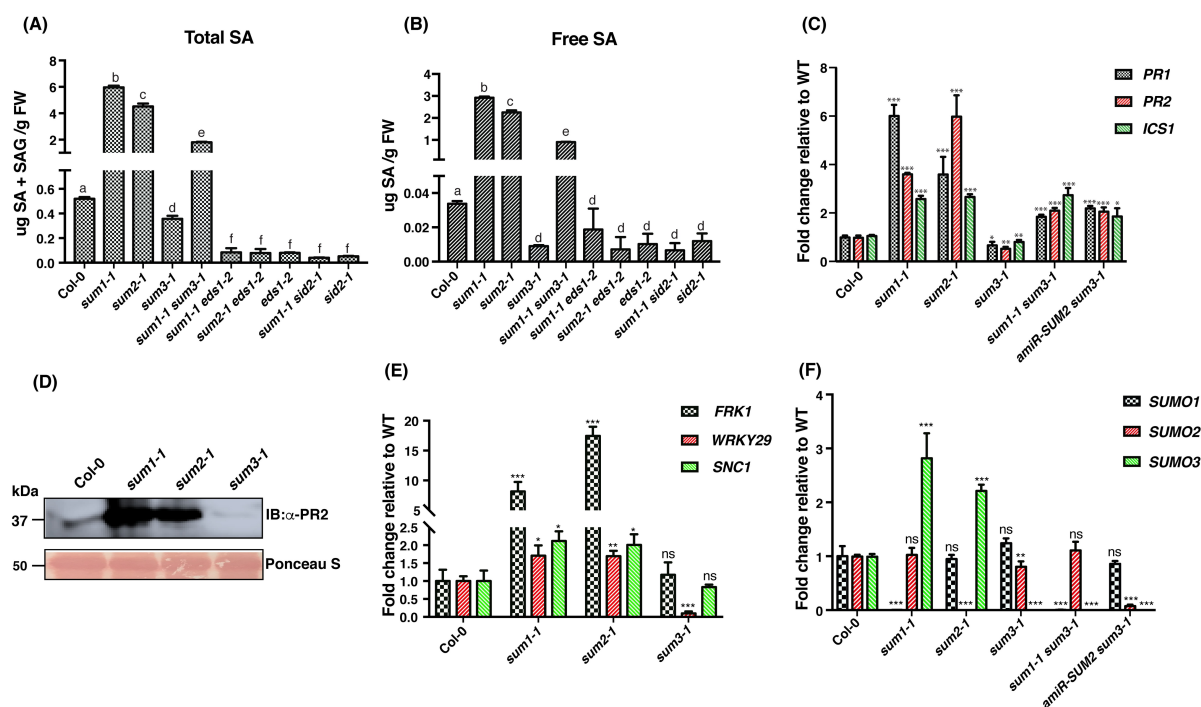

**Fig 2: Basal SA levels and expression of several defense-associated markers are elevated in *sum1-1* or *sum2-1* whereas downregulated in *sum3-1* plants.** (A) Total SA (SA + SAG) and (B) free SA levels in *sum* and combinatorial mutants in 4-week-old plants measured by biosensor *Acinetobacter* method. Data is representative of three biological replicates. Statistical significance calculated by Student's t-test is denoted by alphabet on top of each bar. Different alphabets indicate significance at  $p < 0.001$ . Relative transcript abundance of (C) *PR1*, *PR2*, *ICS1* (E) *FRK1*, *WRKY29*, *SNC1* (F) *SUMO1*, *SUMO2*, and *SUMO3* in 4-week-old SD grown Col-0, *sum* and indicated combinatorial mutants was determined by qRT-PCR and normalized to *SAND* expression. The values are represented as fold change relative to Col-0 (WT). Data is representative of mean of three biological replicates (n=3). Error bars indicate SD. Student's t-test was performed to calculate statistical significance; \*= $p < 0.05$ ; \*\*= $p < 0.01$ ; \*\*\*= $p < 0.001$ , ns= not significant. (D) Total protein extracts from 4-week-old SD grown Col-0, *sum1-1*, *sum2-1*, and *sum3-1* plants were immunoblotted with anti-PR2 antibodies. Ponceau S stain of the Rubisco subunit indicative of equal protein loading between samples is shown. Migration positions of molecular weight standards (in kDa) are indicated.

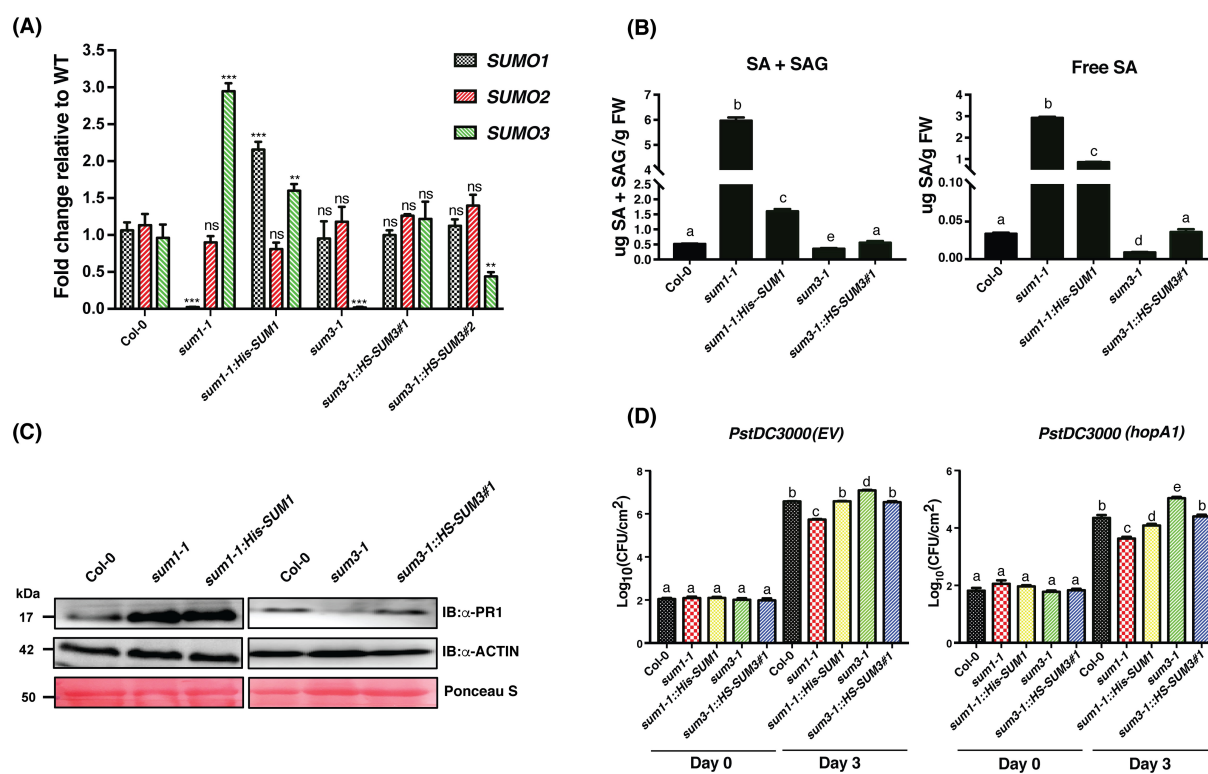

**Fig 3. Altered defense responses to *PstDC3000* strains in *sum1-1* or *sum3-1* plants are restored to wild-type levels in the respective complemented lines.** (A) Relative transcript abundance of *SUMO1*, *SUMO2* and *SUMO3* in 4-week-old SD grown Col-0, *sum* mutants and the corresponding complemented line(s) was determined by qRT-PCR and normalized to *SAND* expression. The values are represented as fold change relative to Col-0 (WT). Data is representative of mean of three biological replicates (n=3). Error bars indicate SD. Statistical significance was determined by Student's t-test; \*\*=*p*<0.01; \*\*\*=*p*<0.001, ns= not significant. (B) Total (left panel) and free SA (right panel) levels in *sum* mutants and the complemented lines. Data is representative of three biological replicates. Statistical significance was determined by Student's t-test and represented by alphabets with significance at *p*<0.001. (C) Endogenous PR1 protein levels in *sum* and complemented lines. Immunoblot with anti-Actin antibodies and Ponceau S staining of membrane show equal protein loading among the extracts. (D) Growth of (left panel) virulent *PstDC3000(EV)* or (right panel) avirulent *PstDC3000(hopA1)* strains, respectively in the indicated plants. Leaves from 4-week-old plants of each line were infiltrated with the indicated bacterial suspension at a density of  $5 \times 10^4$  cfu ml<sup>-1</sup>. Leaf discs from the infiltrated area was macerated in 10mM MgCl<sub>2</sub>, serially diluted and plated on appropriate antibiotic plates. Bacterial titers calculated at 0- and 3-dpi (days post-infiltration) for the indicated infection are shown. Different alphabets denote statistical significance at *p*-value <0.001.

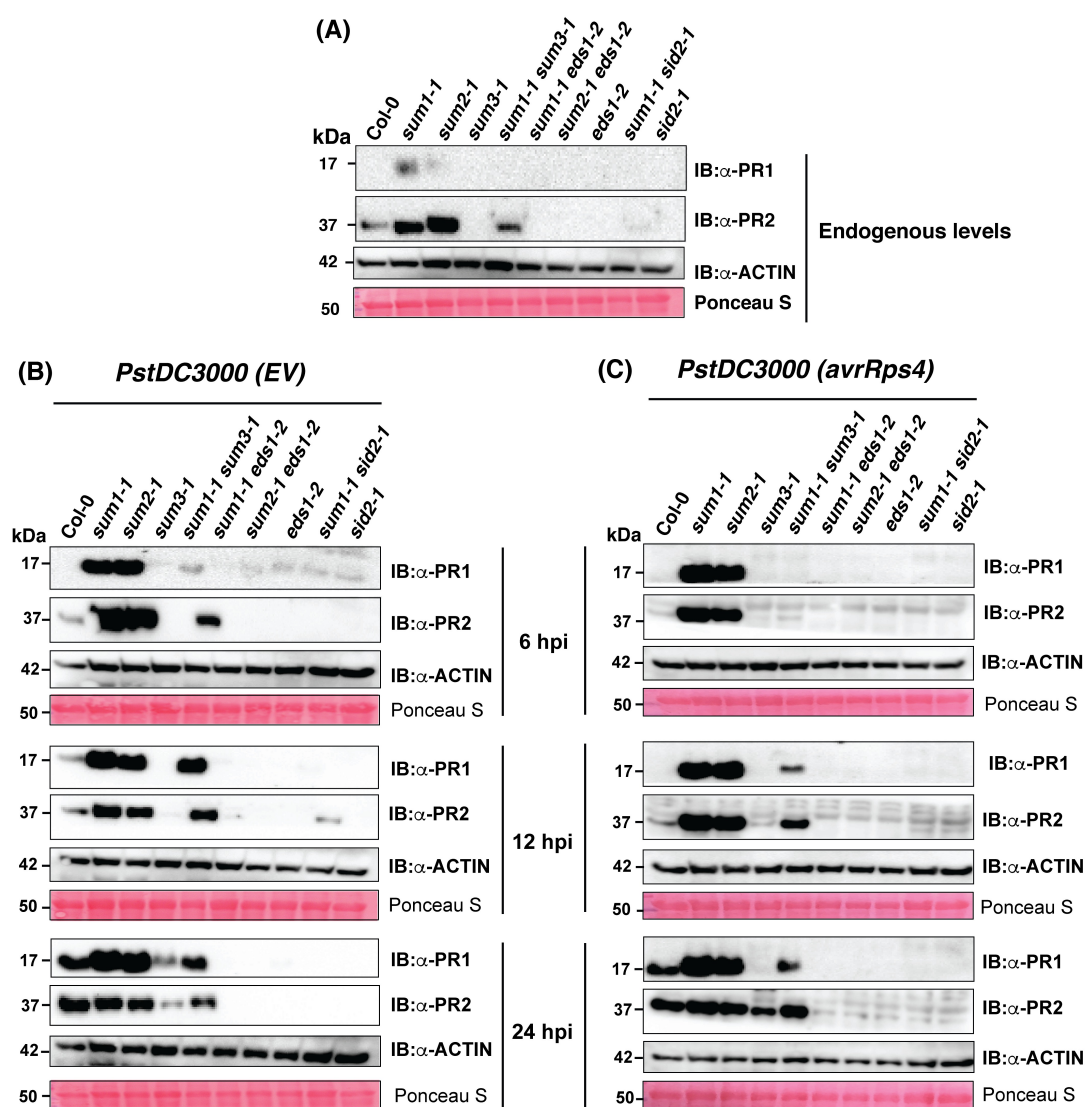

**Fig 4: *sum1-1* and *sum2-1* display enhanced basal and rapid induction of PR1 and PR2 proteins upon pathogen challenge whereas *sum3-1* plants are deficient in these responses.** Total protein from 4-week-old SD grown Col-0, *sum1-1*, *sum2-1*, *sum3-1*, *sum1-1 sum3-1*, *sum1-1 eds1-2*, *sum2-1 eds1-2*, *eds1-2*, *sum1-1 sid2-1*, and *sid2-1* was extracted from (A) un-infiltrated or at 6-, 12-, and 24-hpi (hours post-infiltration) with either (B) virulent *PstDC3000(EV)* or (C) avirulent *PstDC3000(avrRps4)* strains and immunoblotted with anti-PR1 or anti-PR2 antibodies. The membranes were also probed with anti-Actin antibodies or stained with Ponceau S for Rubisco subunit to indicate comparable loading between extracts. Migration position of protein molecular weight standards (in kDa) are indicated.

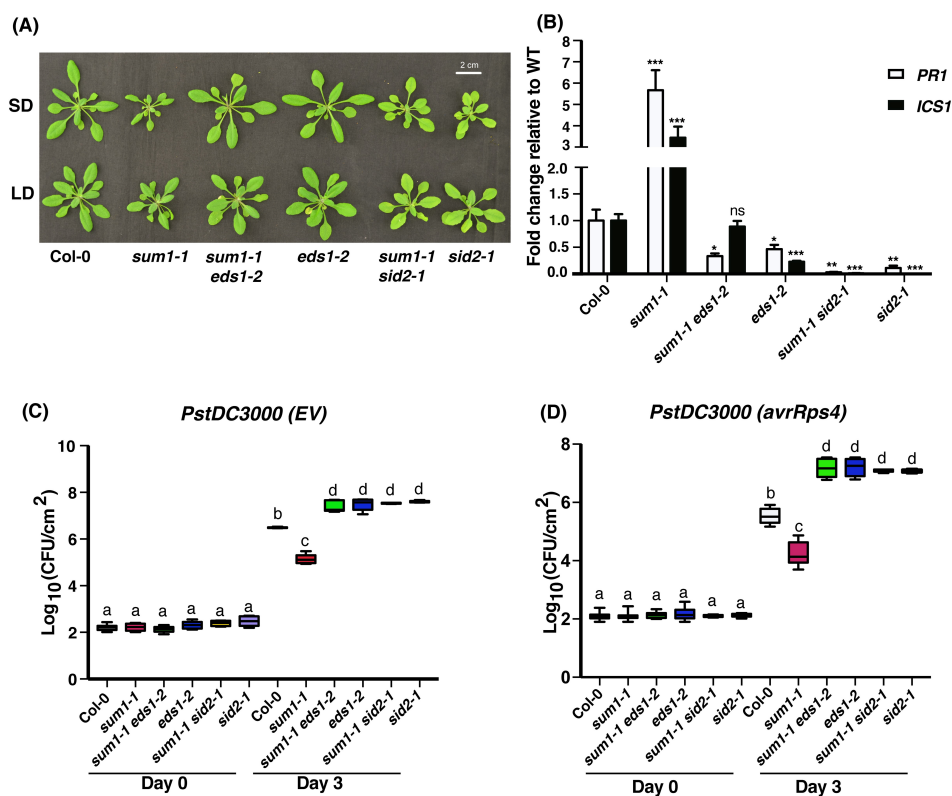

**Fig 5: Growth retardation and enhanced defenses in *sum1-1* are SA-dependent.** (A) Developmental phenotypes of 4-week-old Col-0, *sum1-1*, *sum1-1 eds1-2*, *eds1-2*, *sum1-1 sid2-1*, and *sid2-1* plants grown under SD and LD growth conditions. (B) Relative transcript abundance of *PR1* and *ICS1* in 4-week-old SD grown indicated plants was determined by qRT-PCR and normalized to *SAND* expression. The values are represented as fold change relative to Col-0 (WT). Data is representative of independent experiments (n=3). Error bars indicate SD. Student's t-test significances are mentioned (\*= $p < 0.05$ ; \*\*= $p < 0.01$ ; \*\*\*= $p < 0.001$ ). Growth of (C) virulent *PstDC3000*(EV) and (D) avirulent *PstDC3000* (*avrRps4*) strains, respectively in indicated plants are shown. Three to four expanded leaves from 4-week-old SD grown plants of each genotype were infiltrated with the indicated bacterial suspension at a density of  $5 \times 10^4$  cfu ml<sup>-1</sup>. Leaf discs were punched from the infiltrated area, macerated in 10mM MgCl<sub>2</sub>, serially diluted and plated on appropriate antibiotic plates. Bacterial titer was calculated at 0- and 3-dpi for the indicated infiltration. Whisker Box plot with Tukey test; n= 12-18; ANOVA was performed to measure statistical significant differences (at  $p$ -value < 0.001) in growth of bacteria in Log<sub>10</sub> scale.

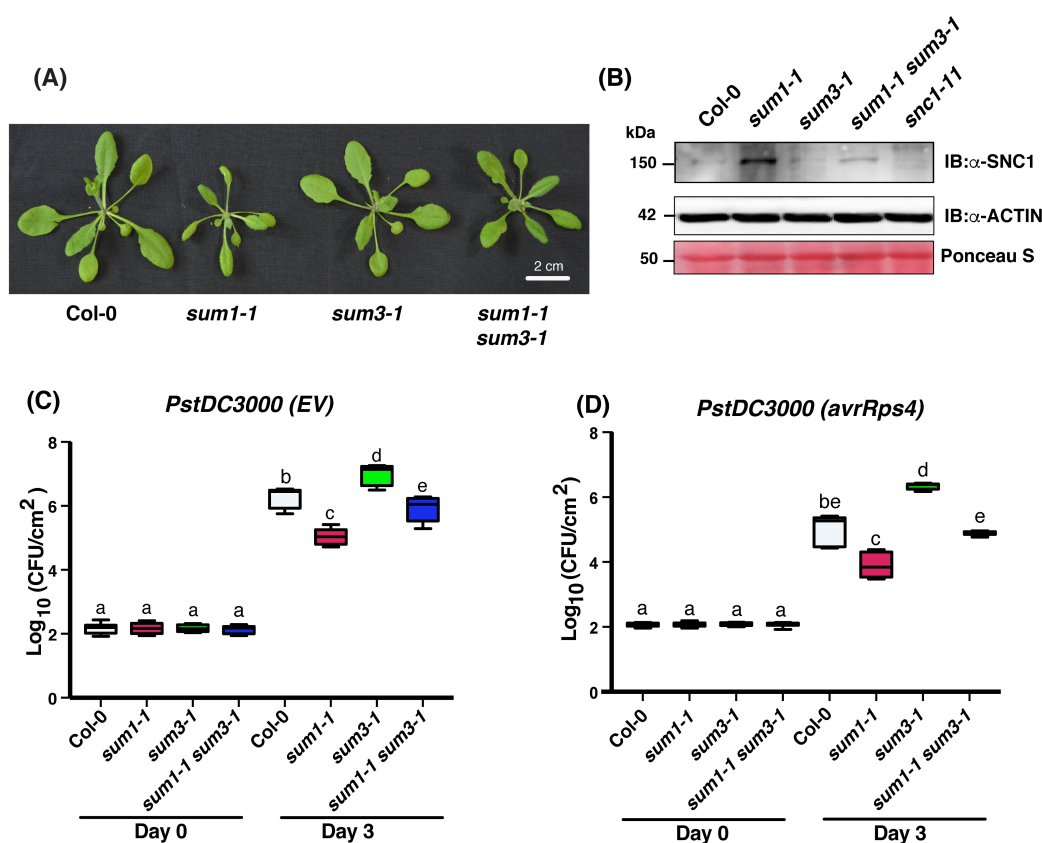

**Fig 6: *sum3-1* alleviates developmental defects and enhanced defense responses in *sum1-1*.**

(A) Developmental phenotypes of 4-week-old SD grown Col-0, *sum1-1*, *sum3-1* and *sum1-1 sum3-1* plants. (B) Total protein extracts from indicated plants were immunoblotted with anti-SNC1 antibodies. Ponceau S stain of the Rubisco subunit and anti-Actin immunoblot indicative of equal protein loading between samples are shown. Migration positions of molecular weight standards (in kDa) are indicated. Growth of (C) virulent *PstDC3000(EV)* or (D) avirulent *PstDC3000(avrRps4)* strains, respectively in indicated plants. Three expanded leaves from 4-week-old SD grown plants of each genotype were infiltrated with the respective bacterial suspension at a density of  $5 \times 10^4$  cfu ml<sup>-1</sup>. Leaf discs of predefined diameter were punched from the infiltrated area, macerated in 10mM MgCl<sub>2</sub>, serially diluted and plated on appropriate antibiotic plates. Bacterial titer was calculated at 0- and 3-dpi with for indicated infiltration. Whisker Box plot with Tukey test; n= 12; ANOVA was performed to measure statistical significance (at *p-value* <0.001) in growth of bacteria in Log<sub>10</sub> scale.

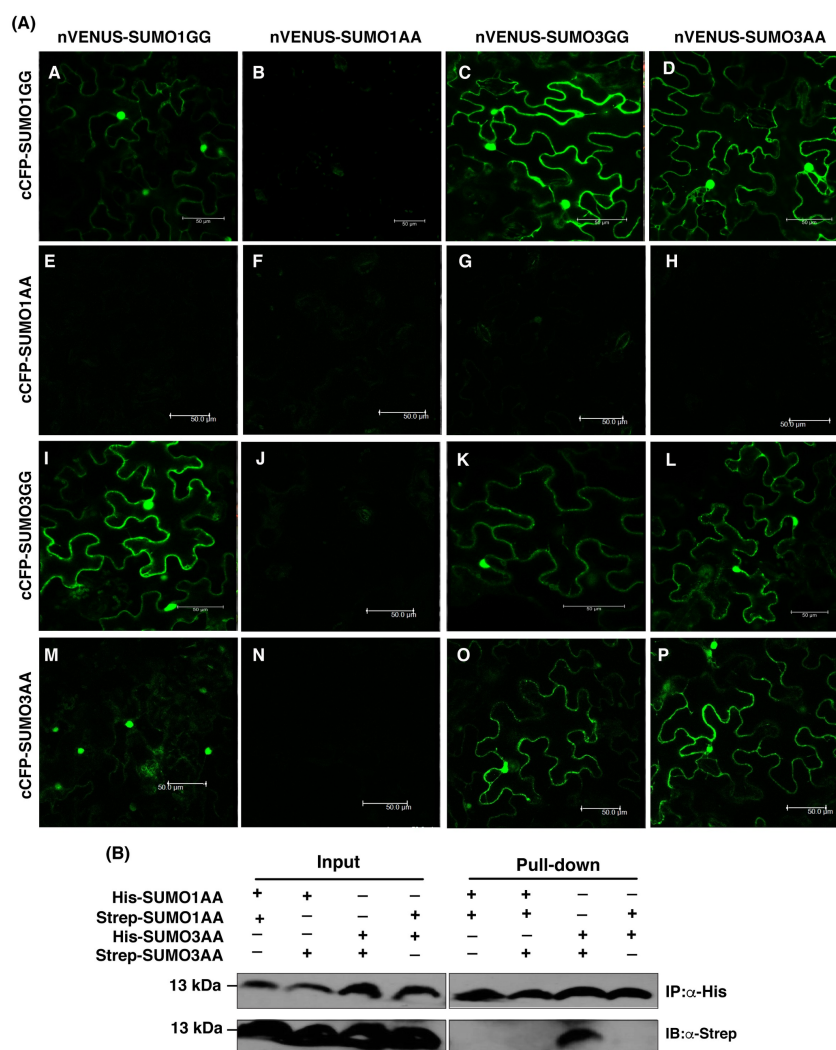

**Fig 7: SUMO3, but not SUMO1, can form oligomers.** (A) Green fluorescence indicative of YFP reconstitution between BiFC (Bi-molecular Fluorescence complementation) combinations of SUMOylation proficient (GG) or deficient (AA) forms of SUMO1 and SUMO3 isoforms are shown. *Agrobacterium* GV3101 strains expressing the indicated BiFC constructs were co-infiltrated in expanded *N. benthamiana* leaves. Infiltrated leaf sections were visualized under a confocal microscope at 2-days post-infiltration (dpi). (Scale bar = 50 μm). Images are representative of pattern observed in two independent experiments. (B) *In vitro* binding assays between SUMO1 and SUMO3 isoforms. His- or Strep-II-tagged SUMO1 or SUMO3 isoform as indicated were expressed in *E. coli*. Bacterial lysates from indicated combinations were mixed and enriched through the Ni<sup>2+</sup>-NTA matrix. Enrichment of the mentioned His-SUMO and the co-eluting isoform was investigated via immunoblotting with anti-His or anti-Strep antibodies, respectively (pull-down panel). The input panel shows the protein levels in the extracts used for the enrichments. Position of protein molecular weight standards (in kDa) are indicated.

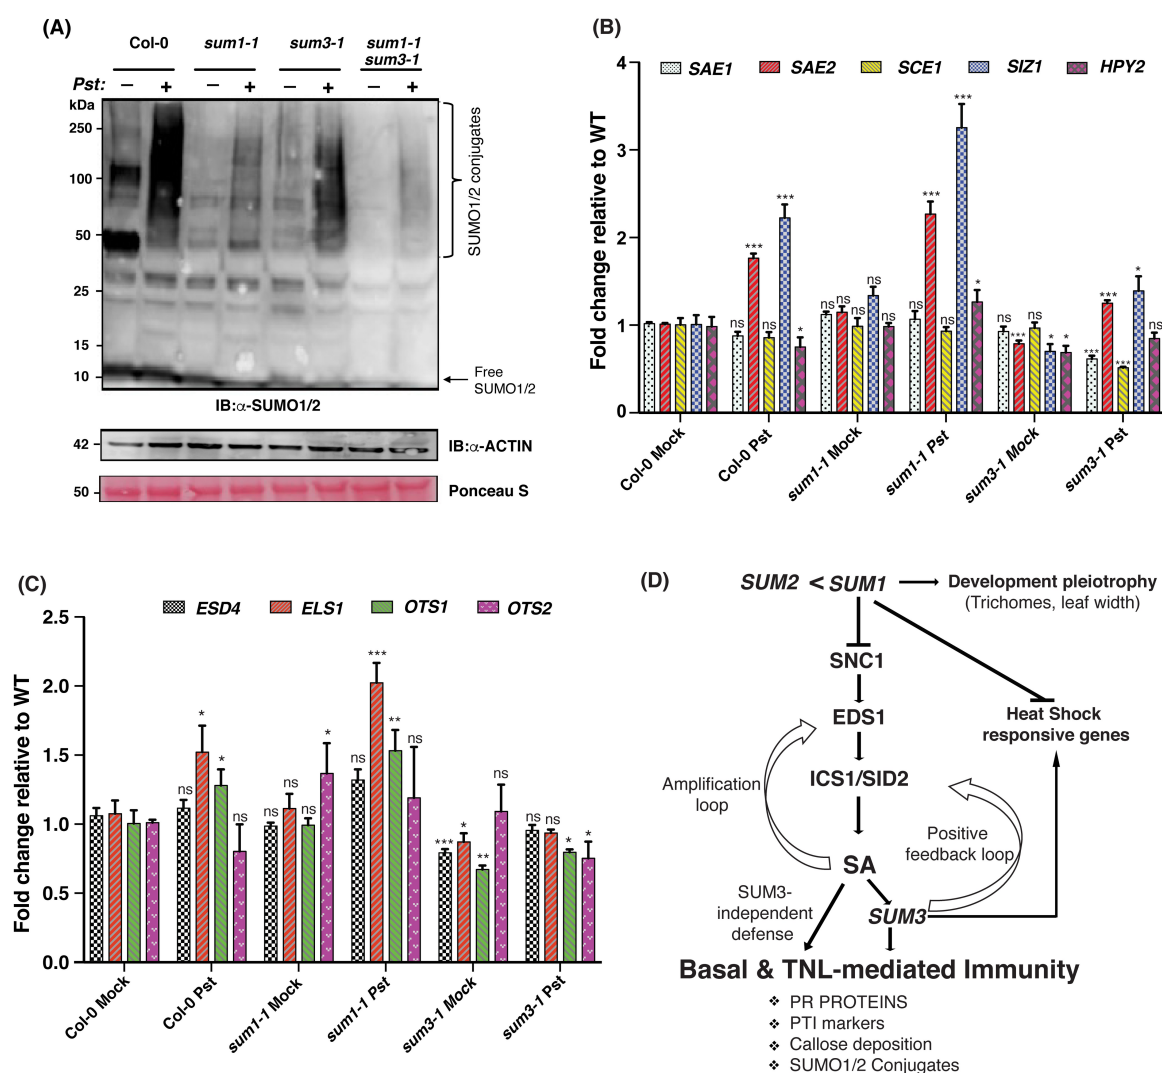

**Fig 8: Loss of *SUM3* reduces SUMO1/2-conjugate enhancements in response to *PstDC3000(EV)* infection.** (A) Fully expanded 3-4 leaves from 4-week-old SD grown Col-0, *sum1-1*, *sum3-1* and *sum1-1 sum3-1* plants were infiltrated either with buffer alone (- lanes) or with the virulent *PstDC3000(EV)* strain (+ lanes) at a density of  $5 \times 10^6$  cfu ml<sup>-1</sup>. Total protein isolated from the infected leaves at 24 hrs post-infiltration (hpi) was used for immunoblotting with anti-SUMO1/2 antibodies. Approximate positions of SUMO1/2-conjugates are shown. Anti-Actin immunoblot or Ponceau S staining demonstrate comparable protein loadings from the extracts. Relative positions of protein molecular weight standards (in kDa) are indicated. Relative transcript abundance at 24-hpi of (B) *SAE1*, *SAE2*, *SCE1*, *SIZ1*, *HPY2* and (C) *ESD4*, *ELS1*, *OTS1*, *OTS2* in mock versus *PstDC3000(EV)* infiltrated samples of Col-0, *sum1-1* and *sum3-1* was determined by qRT-PCR and normalized to *SAND* expression. The values are represented as fold change relative to Col-0 (WT). Data is representative of mean of three biological replicates (n=3). Error bars indicate SD. Student's t-test was performed to calculate statistical significance; \*= $p < 0.05$ ;

\*\*= $p < 0.01$ ; \*\*\*= $p < 0.001$ , ns= not significant. (D) Genetic model for *SUM1/2* crosstalks with *SUM3* in regulation of SA-dependent defences and heat-shock responses in *Arabidopsis*. *SUM1/2* function additively but not equally as negative regulators of defences via modulation of SA-signaling routes and expression of defense-associated markers. Pathogen exposure induce SA-dependent *SUM3* role as a positive regulator leading to increase in SUMO1/2-conjugation proficiencies, and expression of response-appropriate markers such as PR proteins, PTI markers, and callose deposits. Induced SUMO1/2-conjugates modulate SUMO3 functions and prevents overshooting of responses. *SUM1* also regulates via *SUM3*-independent but SA-dependent developmental aspects such as trichome production and leaf textures.
